## **Neuroanatomical and Functional Consequences of Oxytocin Treatment at Birth**

**William M. Kenkel, Richard J. Ortiz, Jason R. Yee, Allison M. Perkeybile, Praveen Kulkarni, C. Sue Carter, Craig F. Ferris**

### **ABSTRACT:**

Birth is a critical period for the developing brain, a time when surging hormone levels help prepare the fetal brain for the tremendous physiological changes it must accomplish upon entry into the 'extrauterine world'. A number of obstetrical conditions warrant manipulations of these hormones at the time of birth, but we know little of their possible consequences on the developing brain. One of the most notable birth signaling hormones is oxytocin, which is administered to roughly 50% of laboring women in the United States prior to / during delivery. Previously, we found evidence for behavioral, epigenetic, and neuroendocrine consequences in adult prairie vole offspring following maternal oxytocin treatment immediately prior to birth. Here, we examined the neurodevelopmental consequences in adult prairie vole offspring following maternal oxytocin treatment immediately. Control prairie voles and those exposed to 0.25 mg/kg oxytocin were scanned as adults using anatomical and functional MRI, with neuroanatomy and brain function analyzed as voxel-based morphometry and resting state functional connectivity, respectively. Overall, anatomical differences brought on by oxytocin treatment, while widespread, were generally small, while differences in functional connectivity, particularly among oxytocin-exposed males, were larger. Analyses of functional connectivity based in graph theory revealed that oxytocin-exposed males in particular showed markedly increased connectivity throughout the brain and across several parameters, including closeness and degree. These results are interpreted in the context of the organizational effects of oxytocin exposure in early life and these findings add to a growing literature on how the perinatal brain is sensitive to hormonal manipulations at birth.

## **BACKGROUND:**

Oxytocin (OXT) is a potent and pleiotropic hormone that surges at birth to help facilitate the tremendous changes that both mammalian mothers and their offspring must accomplish upon delivery [1,2]. As of 2019, 29.4% of laboring women in the U.S. received OXT to induce labor [3], and according to available survey data, this figure raises to ~50% of birthing women in America when considering OXT used to either induce and/or augment labor [4]. This obstetric practice is of interest to neuroscience because there is evidence OXT can cross the placenta [5] and a growing literature suggests the neonatal brain is particularly sensitive to OXT around the time of birth, when OXT receptor (*Oxtr*) expression begins to accelerate [6] and OXT neurons in the brain undergo intense remodeling [7]. Indeed, the long-term, developmental effects of OXT manipulations in early life are well-documented [8,9], which suggests the perinatal period may be a *sensitive period* with regard to the impact of OXT.

Some initial studies suggested higher rates of autism spectrum and attention deficit / hyperactivity disorder amongst children born to women whose labors were induced with OXT; however, meta-analysis of such findings suggest that any such conclusions remain premature [10]. While there have been conflicting reports as to whether OXT administered to induce / augment labor is associated with increased rates of autism spectrum disorder or autistic-like behavior in offspring, considerations of dose add an important degree of nuance to this topic [11,12]. Thus, regardless of whether the consequences of obstetrically administered OXT raise to the level of a neurodevelopmental disorder, the question of whether OXT affects offspring neurodevelopment is of great public health relevance given its widespread use.

Previously, we investigated the impact of maternally administered OXT on offspring neurodevelopment and behavior using the socially monogamous prairie vole [13]. We found that fetal physiology was indeed sensitive to maternally administered OXT and that, in the fetal brain, such OXT dose-dependently increased methylation of the *Oxtr* promoter. In adulthood, OXT-exposed offspring of both sexes were found to demonstrate a broadly gregarious phenotype such that they exhibited more spontaneous alloparental care toward unrelated pups and spent more time in close social contact with opposite-sex adults. Male voles exposed to OXT also showed increased density of OXT receptor in the central amygdala, insular cortex, and parietal cortex, while showing decreased vasopressin receptor density in the ventral pallidum.

Because OXT is a pleiotropic hormone, we opted for a broad survey of the brain in the present study, carrying out whole-brain resting functional connectivity to further characterize the scope of the neurodevelopmental consequences of OXT exposure at birth. Here, we scanned adult prairie vole offspring of pregnant females treated with 0.25 mg/kg OXT on the expected day of delivery.

## **METHODS:**

### *Subjects*

Prairie vole offspring (*Microtus ochrogaster*) were generated as previously described [13]. All procedures were conducted in accordance with the National Institutes of Health Guide for the Care and Use of Laboratory Animals and were approved by the Institutional Animal Care and Use Committee of Northeastern University. On the expected day of delivery, pregnant females were either injected intraperitoneally with OXT (0.25 mg/kg, 'OXT') or left undisturbed ('Control'). Offspring were only included if they were delivered within 24 hours of OXT treatment. Offspring were raised by their birth parents as we previously observed no effect of maternal-OXT treatment on offspring outcomes [13]. At 20 days of age, OXT and Control offspring were weaned into same-sex sibling pairs and were left to mature. Upon reaching adulthood (postnatal days 60-70), OXT and Control offspring underwent three neuroimaging scans: aT1-weighted anatomical scan for voxel based morphometry scan (VBM), an awake, resting state functional scan (rs-fMRI), and an anesthetized diffusion-weighted imaging scan (DWI), as detailed below. Subject offspring consisted of 17 Control females, 19 Control males, 17 OXT females, and 16 OXT males. From these, 7 Control females, 12 Control males, 13 OXT females and 13 OXT males were ultimately included in the rs-fMRI analyses after removing subjects due to motion artefact or technical difficulties.

## *Neuroimaging*

All neuroimaging measures were collected using a Bruker BioSpec 7.0T/20-cm Ultra Shield Refrigerated horizontal magnet (Bruker, Billerica, MA). A 20-G/cm magnetic field gradient insert (inner diameter 12 cm) was used to scan anesthetized subjects using a quadrature transmit/receive volume coil (inner diameter 38 mm). Imaging sessions began with an anatomical scan with the following parameters: 20 slices; slice thickness, 0.70 mm; field of view, 2.5 cm; data matrix, 256 x 3 x 256; repetition time, 2.5 seconds; echo time (TE), 12.0 ms; effective TE, 48 ms; number of excitations, 2; and total acquisition time, 80 seconds.

### *Voxel Based Morphometry (VBM)*

The following procedures were adapted for use in the vole from those described previously for rats [14]. For each subject, the atlas (image size 256 x 256 x 63) (H x W x D) was warped from the standard space into the subject image space (image size 256 x 256 x 40) using the nearest-neighbor interpolation method. In the volumetric analysis, each brain region was therefore segmented, and the volume values were extracted for all 111 regions of interest (ROIs), calculated by multiplying unit volume of voxel (in mm<sup>3</sup>) by the number of voxels using an in-house MATLAB script. To account for different brain sizes, all ROI volumes were normalized by dividing each subject's ROI volume by their total brain volume.

### *Diffusion-weighted Imaging (DWI)*

The following procedures were identical to those described previously [15,16]. Diffusion-weighted imaging (DWI) was acquired with a spin-echo echo-planar imaging (EPI) pulse sequence with the following parameters: repetition time/TE, 500/20 ms; 8 EPI segments; and 10 noncollinear gradient directions with a single b-value shell at 1000 seconds/mm<sup>2</sup> and 1 image with a b-value of 0 seconds/mm<sup>2</sup> (referred to as b<sub>0</sub>). Geometrical parameters were as follows: 48 coronal slices, each 0.313 mm thick (brain volume) and with in-plane resolution of 0.313 x 3 x 0.313 mm<sup>2</sup> (matrix size, 96 x 3 x 96; field of view, 30 mm<sup>2</sup>). The imaging protocol was repeated 2 times for signal averaging. DWI acquisition took 35 to 70 minutes. DWI included diffusion-weighted three-dimensional EPI image analysis producing fractional anisotropy (FA) maps and apparent diffusion coefficient. DWI analysis was implemented with MATLAB (version 2017b) (The MathWorks, Inc., Natick, MA) and MedINRIA version 1.9.0 (<http://www-sop.inria.fr/asclepios/software/MedINRIA/index.php>) software.

Each brain volume was registered with the three-dimensional MRI Vole Brain Atlas template (Ekam Solutions LLC, Boston, MA) allowing voxel- and region-based statistics [17]. In-house MIVA software was used for image transformations and statistical analyses. For each vole, the b<sub>0</sub> image was coregistered with the b<sub>0</sub> template (using a 6-parameter rigid-body transformation). The coregistration parameters were then applied on the DWI indexed maps for each index of anisotropy. Normalization was performed on the maps providing the most detailed and accurate visualization of brain structures. Normalization parameters were then applied to all indexed maps and then smoothed with a 0.3-mm Gaussian kernel. To ensure that preprocessing did not significantly affect anisotropy values, the nearest neighbor option was used following registration and normalization.

### *Resting State Functional MRI (rs-fMRI)*

We used the same equipment and scanning protocols as in our recent work; for complete details see [17–19]. Data were analyzed as 111 nodes corresponding to brain regions specified in a vole-specific atlas [17]. Pearson's correlation coefficients were computed per subject across all node pairs (6105), assessing temporal correlations between brain regions. Then, r-values' (-1 to 1) normality were improved using Fisher's Z-transform. For each group, 111x111 symmetric connectivity matrices were constructed, each entry representing the strength of edge. An |Z|=2.3 threshold was used to avoid spurious or weak node connections [20].

### *Network Analyses*

Graph theory network analysis was generated using Gephi, an open-source network and visualization software [21]. For all groups, the absolute values of their respective symmetric connectivity matrices were imported as undirected networks and a threshold of  $|Z|=2.3$  was applied to each node's edges to avoid spurious or weak node connections [22].

### *Betweenness Centrality*

Betweenness centrality analyzes occurrences where a node lies in the path connecting other nodes [23]. Let  $n_{i,j}^k$  be the number of pathways from  $i$  to  $j$  going through  $k$ . Using these measures of connection, the betweenness of vertex  $k$  is:

$$B_k = \sum_{ij} \frac{n_{ij}^k}{n_{ij}}$$

### *Degree Centrality*

Degree centrality indicates the number of associations of a specific node [24]. Non-weighted, binary degree is defined as:

$$C_D(j) = \sum_{i=1}^n A_{ij}$$

where  $n$  is the number of rows in the matrix in the adjacency matrix  $\mathbf{A}$  and the elements of the matrix are given by  $A_{ij}$ , the number of edges between nodes  $i$  and  $j$ .

### *Closeness Centrality*

Closeness centrality measures the average distance from a given starting node to all other nodes in the network [25]. Closeness is defined as:

$$C(x) = \frac{N - 1}{\sum_y d(y, x)}$$

where  $d(y,x)$  is the distance between vertices  $x$  and  $y$  and  $N$  is the number of nodes in the graph.

### *Statistics*

Normality tests of control females, control males, OXT females and OXT males were performed to examine if parametric or non-parametric assumptions were required for future analysis. Shapiro-Wilk's tests were performed to examine normality assumption for degree, closeness and betweenness centrality values. Regional p-values that were greater than 0.05 were assumed to be normal. A corresponding list of nodes that classified a region is detailed in table S\_\_\_\_. After assumptions of normality were validated, one-way ANOVA tests were used to compare differences in degree, closeness and betweenness centralities between groups. When necessary, a nonparametric Kruskal-Wallis test was performed if there was evidence against normality assumption. Statistical differences between groups were determined using a Mann-Whitney U test ( $\alpha = 5\%$ ). The following formula was used to account for false discovery from multiple comparisons:

$$P(i) \leq \frac{i}{V} \frac{q}{c(V)}$$

$P(i)$  is the p value based on the t test analysis. Each of 111 regions of interest (ROIs) ( $i$ ) within the brain containing  $V$  ROIs. For graph theory measures, statistical analyses were calculated using GraphPad Prism version 9.0.0 for MacOS (GraphPad Software, San Diego, California USA, [www.graphpad.com](http://www.graphpad.com)).

## **RESULTS:**

We observed a number of differences in VBM measures; however most were small to very small in effect size (Figures \_\_). Within the Control group, there was only a single sex difference in regional volume. Within the OXT group, however, OXT females had larger volumes in 8 of 17 cortical regions and smaller volumes in 11 brainstem / cerebellar regions compared to OXT males (Table \_\_). Similarly, Control males had larger volumes in 9 of 17 cortical regions and smaller volumes in 9 brainstem / cerebellar regions compared to OXT males (Table \_\_). Comparing within females, OXT treatment at birth resulted in smaller volumes in 4 of 17 cortical regions. Control animals generally had larger amygdalar volumes than OXT animals (4 of 6 subregions in males; 2 of 6 in females). When morphometry data from all 111 brain regions were loaded into a PCA, the overall explanatory value of dimensions 1 and 2 was modest (29.4% and 15.9% respectively) and there were impacts of both sex and treatment on dimension 1, with male sex and OXT treatment leading to greater values (Figure \_\_).

We observed a broad, albeit subtle pattern of effects in OXT-exposed males in DWI measures. In terms of FA, Control animals showed small but widespread sex differences, with females having greater FA than males across brain regions, a pattern not present in OXT animals due to increased FA among OXT-exposed males (Figure \_\_, Table \_\_). When FA data from all 111 brain regions were loaded into a PCA, there were no effects of either sex or treatment detected. In terms of ADC, Control males had greater ADC values than Control females across many brain regions (Table \_\_) and greater ADC values than OXT males across many brain regions as well (Table \_\_). While we observed widespread ADC differences between Control males and females, we observed no sex differences in ADC in the OXT-exposed condition. The PCA for ADC revealed a discrepancy between Control males and all other groups, with the latter having greater dimension 1 values. Thus, across the brain, OXT males' ADC values more closely resembled Control females and OXT females than they did Control males.

In the analyses of functional connectivity, OXT males stood out as having a widespread pattern of greater connectivity. Whereas Control females were found to have significant functional connectivity in 5% of all possible connections, OXT females had significant connectivity in 7.2% of connections. Whereas Control males had connectivity in 6.3% of connections, OXT males had significant connectivity in 12.5% of connections. While OXT females largely resembled Control females (Figure \_\_), OXT males had more regions significantly functionally connected and stronger correlations in such regions (Figure \_\_).

Similarly, when we examined the degree of connectivity, OXT males again showed a robust, widespread increase across the brain, with the exception of the prefrontal cortex, where the pattern was still present but did not rise to the level of statistical significance (Figure \_\_).

## **DISCUSSION:**

Here we describe how, in prairie voles, exposure to exogenous OXT at birth can impact neurodevelopment in ways that impact neural anatomy and functioning into adulthood. Overall, anatomical differences, while widespread, were generally small, while differences in functional connectivity, particularly among OXT-exposed males, were larger. Anatomically, OXT at birth led to a slight reduction in amygdalar volume and OXT males in particular had slightly smaller cortices and slightly larger brainstem / cerebellums (Figure \_\_). OXT at birth led to males resembling females in terms of FA and ADC (Figures \_\_ and \_\_). However, functionally, OXT males showed marked differences from all other groups. OXT at birth led males to display robustly increased functional connectivity throughout the brain (Figure \_\_). This was particularly the case across the cortex and in the hippocampus (Figure \_\_). What does this notably broad increase in functional connectivity mean for the OXT males? We have at present only a few hints.

Interestingly, the robust and widespread changes in OXT males' neural physiology (i.e. functional connectivity) were greater than the changes observed in neuroanatomy (i.e. VBM and DWI). If OXT males are continuously experiencing high levels of communication between brain regions, we would expect that to eventually produce changes in anatomical connectedness. Either our anatomical measures of connectivity were insufficiently sensitive to detect these changes, or the relatively small changes in anatomy we did detect are sufficient to produce functional changes that are comparatively more robust. The functional connectivity

scans were undertaken with subjects lightly anesthetized, so it is unlikely that OXT males were responding differentially to the conditions of scanning. Furthermore, we have observed no evidence of stress reactivity being affected by perinatal OXT in our previous studies.

One pattern generally observed in the brains of humans with autism spectrum disorders is diminished long-distance functional connectivity and increased short-distance functional connectivity. We saw no such pattern in the OXT males of the present study. While some epidemiological studies have suggested a link between autism spectrum disorders and perinatal oxytocin exposure [10], residual confounding by either genetic or environmental vulnerabilities, could explain this apparent association. Indeed, our previous work, we observed a broadly gregarious phenotype in OXT-exposed voles [13]; if such results translated to humans, they would support the contention that underlying vulnerabilities bring on both a need for OXT in the mother and susceptibility to autism spectrum disorders in the child. While our previous work found behavioral differences in both males and females exposed to OXT, which is somewhat in contrast to the present study's findings, we also found males to be much more affected by perinatal OXT in terms of neuroanatomy, which was assessed as the density of OXT and AVP receptors. Numerous previous studies have found sex-, dose-, and region-dependent effects of early life oxytocin manipulation [8,26].

There have been very few studies on the impact of birth interventions and subsequent brain development. In the realm of neuroanatomy, Deoni and colleagues recently reported that CS results in smaller brain volumes in neonatal mouse pups [27]. However, no such findings have been observed in human children or infants [28]. In terms of VBM and functional connectivity, OXT led males toward a more masculinized phenotype. In terms of ADC and FA, however, OXT led males toward a more feminized phenotype. Further work is needed to reveal the meanings of these differences.

This study is not without limitations. Firstly, because the Control group did not receive a vehicle treatment, the effects of injection were not adequately controlled for, which introduced a stress confound of indeterminate magnitude. In a small validation study, adult offspring of saline-treated dams (n = 3 female, 5 male adult offspring) were not found to have meaningful differences in DWI values compared to the un-treated Control animals of the present study (n = 17 female, 19 male adult offspring).

## **REFERENCES:**

1. Kenkel, W. M., Yee, J. R. & Carter, C. S. Is oxytocin a maternal-foetal signalling molecule at birth? Implications for development. *Journal of neuroendocrinology* **26**, 739–49 (2014).
2. Kingsbury, M. A. & Bilbo, S. D. The inflammatory event of birth: How oxytocin signaling may guide the development of the brain and gastrointestinal system. *Front.Neuroendocrinol.* **55**, 100794 (2019).
3. Martin, J. A., Hamilton, B. E., Osterman, M. J. K. & Driscoll, A. K. Births: Final Data for 2019. *Natl Vital Stat Rep* **70**, 1–51 (2021).
4. Declercq, E. R., Sakala, C., Corry, M. P., Applebaum, S. & Herrlich, A. Major Survey Findings of Listening to MothersSM III: Pregnancy and Birth. *J Perinat Educ* **23**, 9–16 (2014).
5. Malek, A., Blann, E. & Mattison, D. R. Human placental transport of oxytocin. *J.Matern.Fetal.* **5**, 245–255 (1996).
6. Rokicki, J. *et al.* Oxytocin receptor expression patterns in the human brain across development. (2021). doi:10.31219/osf.io/j3b5d
7. Madrigal, M. P. & Jurado, S. Specification of oxytocinergic and vasopressinergic circuits in the developing mouse brain. *Commun Biol* **4**, 1–16 (2021).
8. Hammock, E. A. D. Developmental Perspectives on Oxytocin and Vasopressin. *Neuropsychopharmacology* **40**, 24–42 (2015).
9. Bales, K. L. & Perkeybile, A. M. Developmental experiences and the oxytocin receptor system. *Horm.Behav.* **61**, 313–319 (2012).
10. Lønfeldt, N. N., Verhulst, F. C., Strandberg-Larsen, K., Plessen, K. J. & Lebowitz, E. R. Assessing risk of neurodevelopmental disorders after birth with oxytocin: a systematic review and meta-analysis. *Psychological Medicine* **49**, 881–890 (2019).
11. Guastella, A. J. *et al.* Does perinatal exposure to exogenous oxytocin influence child behavioural problems and autistic-like behaviours to 20 years of age? *J.Child Psychol.Psychiatry* **2018/04/28**, (2018).
12. Soltys, S. M. *et al.* An association of intrapartum synthetic oxytocin dosing and the odds of developing autism. *Autism* **24**, 1400–1410 (2020).
13. Kenkel, W. *et al.* Behavioral and epigenetic consequences of oxytocin treatment at birth. *Science Advances* **5**, eaav2244 (2019).

14. Lawson, C. M., Rentrup, K. F. G., Cai, X., Kulkarni, P. P. & Ferris, C. F. Using multimodal MRI to investigate alterations in brain structure and function in the BBZDR/Wor rat model of type 2 diabetes. *Animal Models and Experimental Medicine* **3**, 285–294 (2020).
15. Kulkarni, P. *et al.* Characterizing the human APOE epsilon 4 knock-in transgene in female and male rats with multimodal magnetic resonance imaging. *Brain Research* **1747**, 147030 (2020).
16. Ferris, C. F. *et al.* Alterations in brain neurocircuitry following treatment with the chemotherapeutic agent paclitaxel in rats. *Neurobiology of Pain* **6**, 100034 (2019).
17. Yee, J. R. *et al.* BOLD fMRI in awake prairie voles: A platform for translational social and affective neuroscience. *Neuroimage* **138**, 221–232 (2016).
18. Ortiz, J. J., Portillo, W., Paredes, R. G., Young, L. J. & Alcauter, S. Resting state brain networks in the prairie vole. *Scientific Reports* **8**, (2018).
19. Ortiz, R. *et al.* Differences in Diffusion-Weighted Imaging and Resting-State Functional Connectivity Between Two Culturally Distinct Populations of Prairie Vole. *Biological Psychiatry: Cognitive Neuroscience and Neuroimaging* (2020). doi:10.1016/j.bpsc.2020.08.014
20. Worsley, K. J. in *Functional Magnetic Resonance Imaging* (Oxford University Press, 2001). doi:10.1093/acprof:oso/9780192630711.003.0014
21. Bastian, M., Heymann, S. & Jacomy, M. Gephi: An Open Source Software for Exploring and Manipulating Networks. *Proceedings of the International AAAI Conference on Web and Social Media* **3**, 361–362 (2009).
22. Worsley, K. J., Evans, A. C., Marrett, S. & Neelin, P. A Three-Dimensional Statistical Analysis for CBF Activation Studies in Human Brain. *J Cereb Blood Flow Metab* **12**, 900–918 (1992).
23. Freeman, L. C. A Set of Measures of Centrality Based on Betweenness. *Sociometry* **40**, 35–41 (1977).
24. Freeman, L. C. Centrality in social networks conceptual clarification. *Social Networks* **1**, 215–239 (1978).
25. Sabidussi, G. The centrality index of a graph. *Psychometrika* **31**, 581–603 (1966).
26. Carter, C. S. Developmental consequences of oxytocin. *Physiol Behav* **79**, 383–97 (2003).
27. Chiesa, M., Rabiei, H., Riffault, B., Ferrari, D. C. & Ben-Ari, Y. Brain Volumes in Mice are Smaller at Birth After Term or Preterm Cesarean Section Delivery. *Cereb Cortex* (2021). doi:10.1093/cercor/bhab033
28. Deoni, S. C. *et al.* PMC6330134; Cesarean Delivery Impacts Infant Brain Development. *AJNR Am.J.Neuroradiol.* **40**, 169–177 (2019).





$Z$  score  
 $(|Z|)$

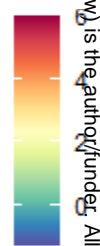

## Oxytocin Females

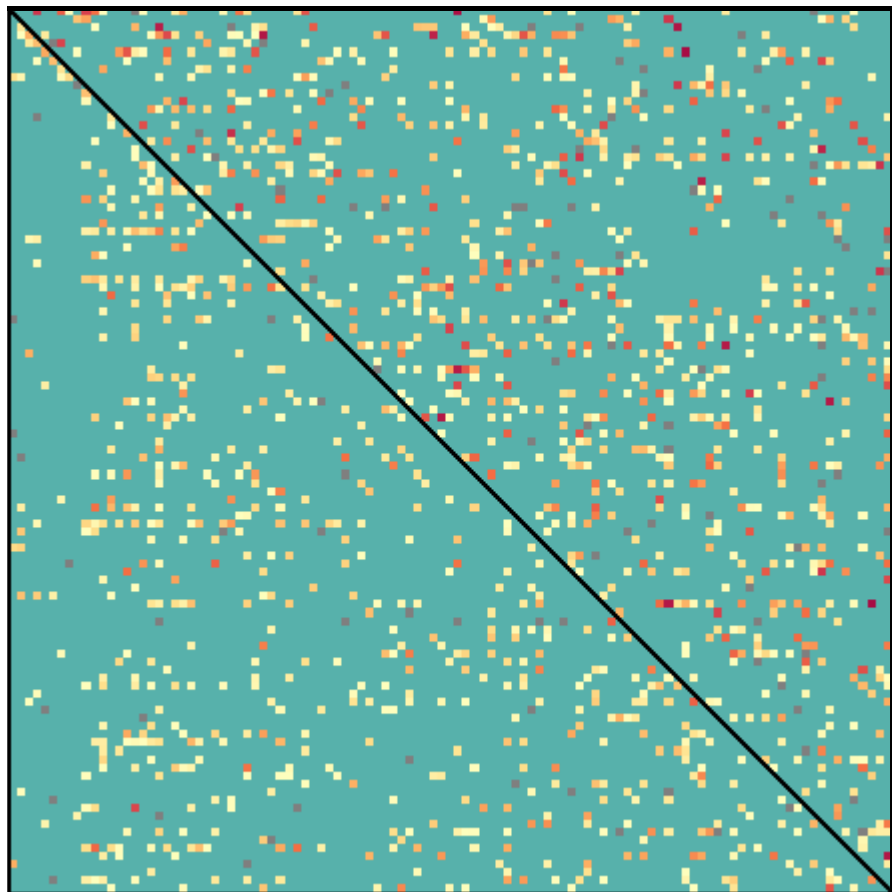

# B

Control Females

## Oxytocin Males

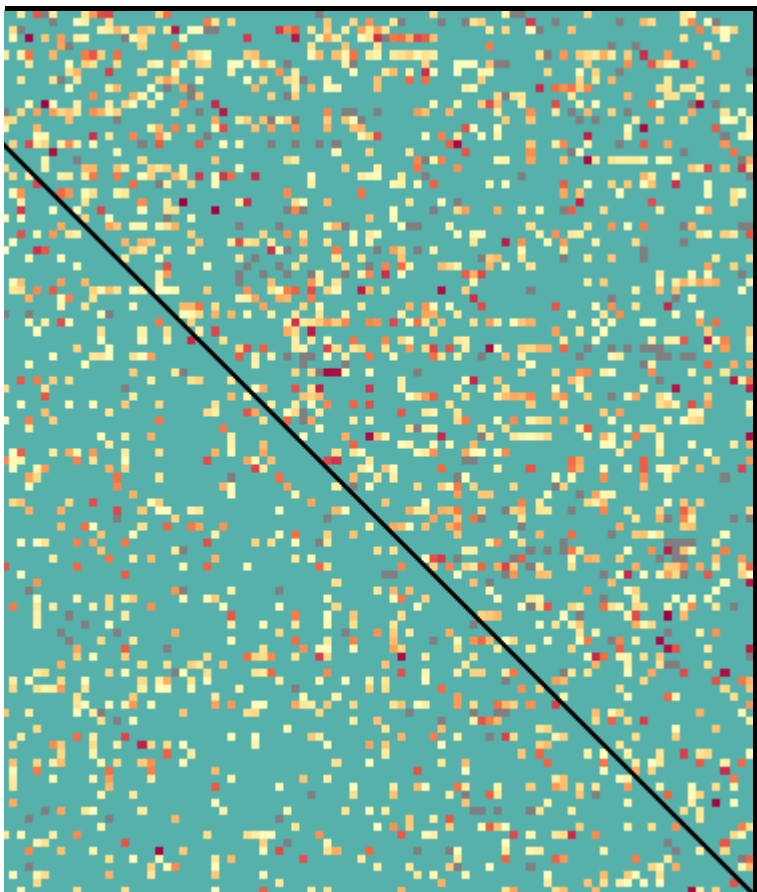

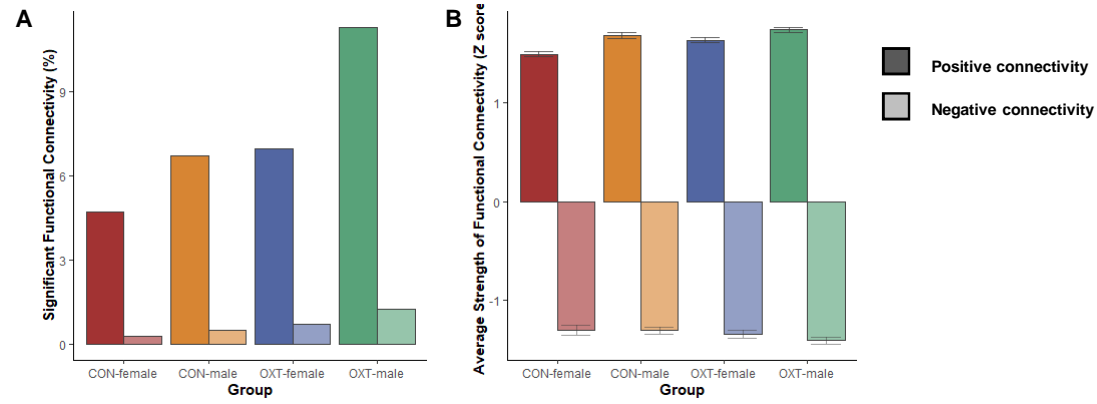

**Figure X.** (A) The proportion of all possible pairwise connections between brain regions that showed significant correlated activity (i.e. connectivity) in either a positive or negative direction for each group / sex. (B) The average strength, as expressed by z-score, of all significantly correlated connections in either a positive or negative direction for each group / sex.

# Strength

CON female

CON male

DXT female

DXT male

actory System

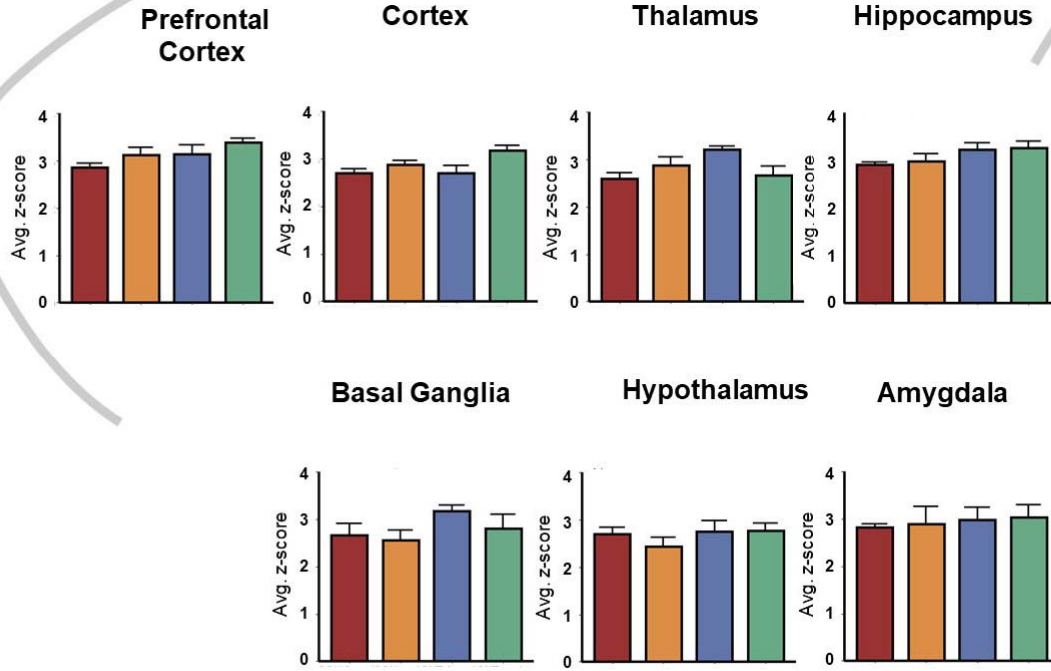

Midbrain

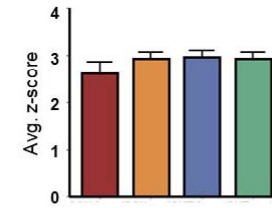

Cerebellum

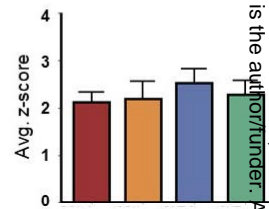

Pons

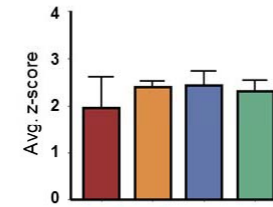

Medulla

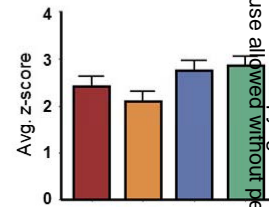

# Betweenness

CON female

CON male

DXT female

DXT male

actory System

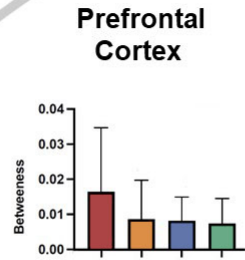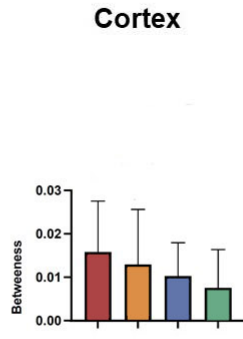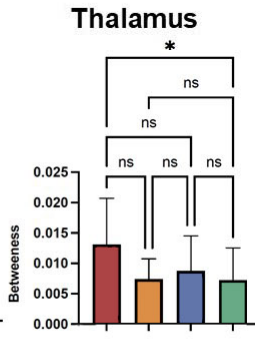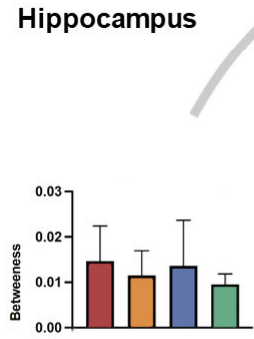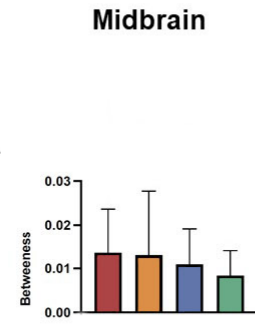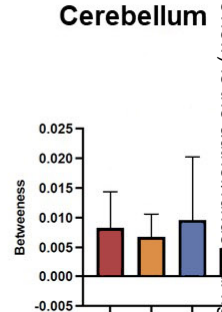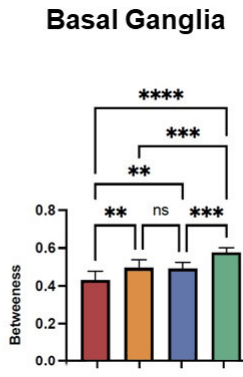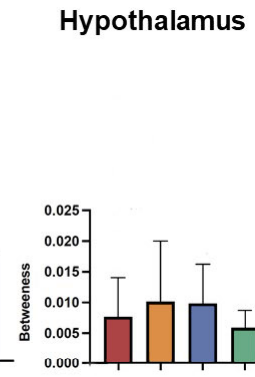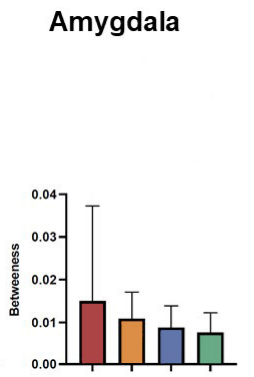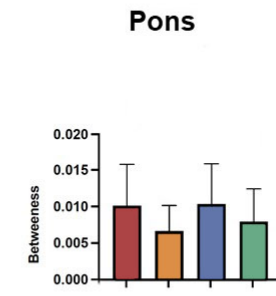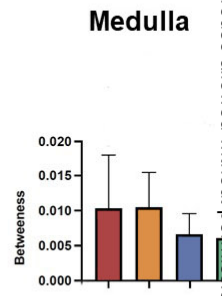

# Closeness

CON female

CON male

DXT female

DXT male

actory System

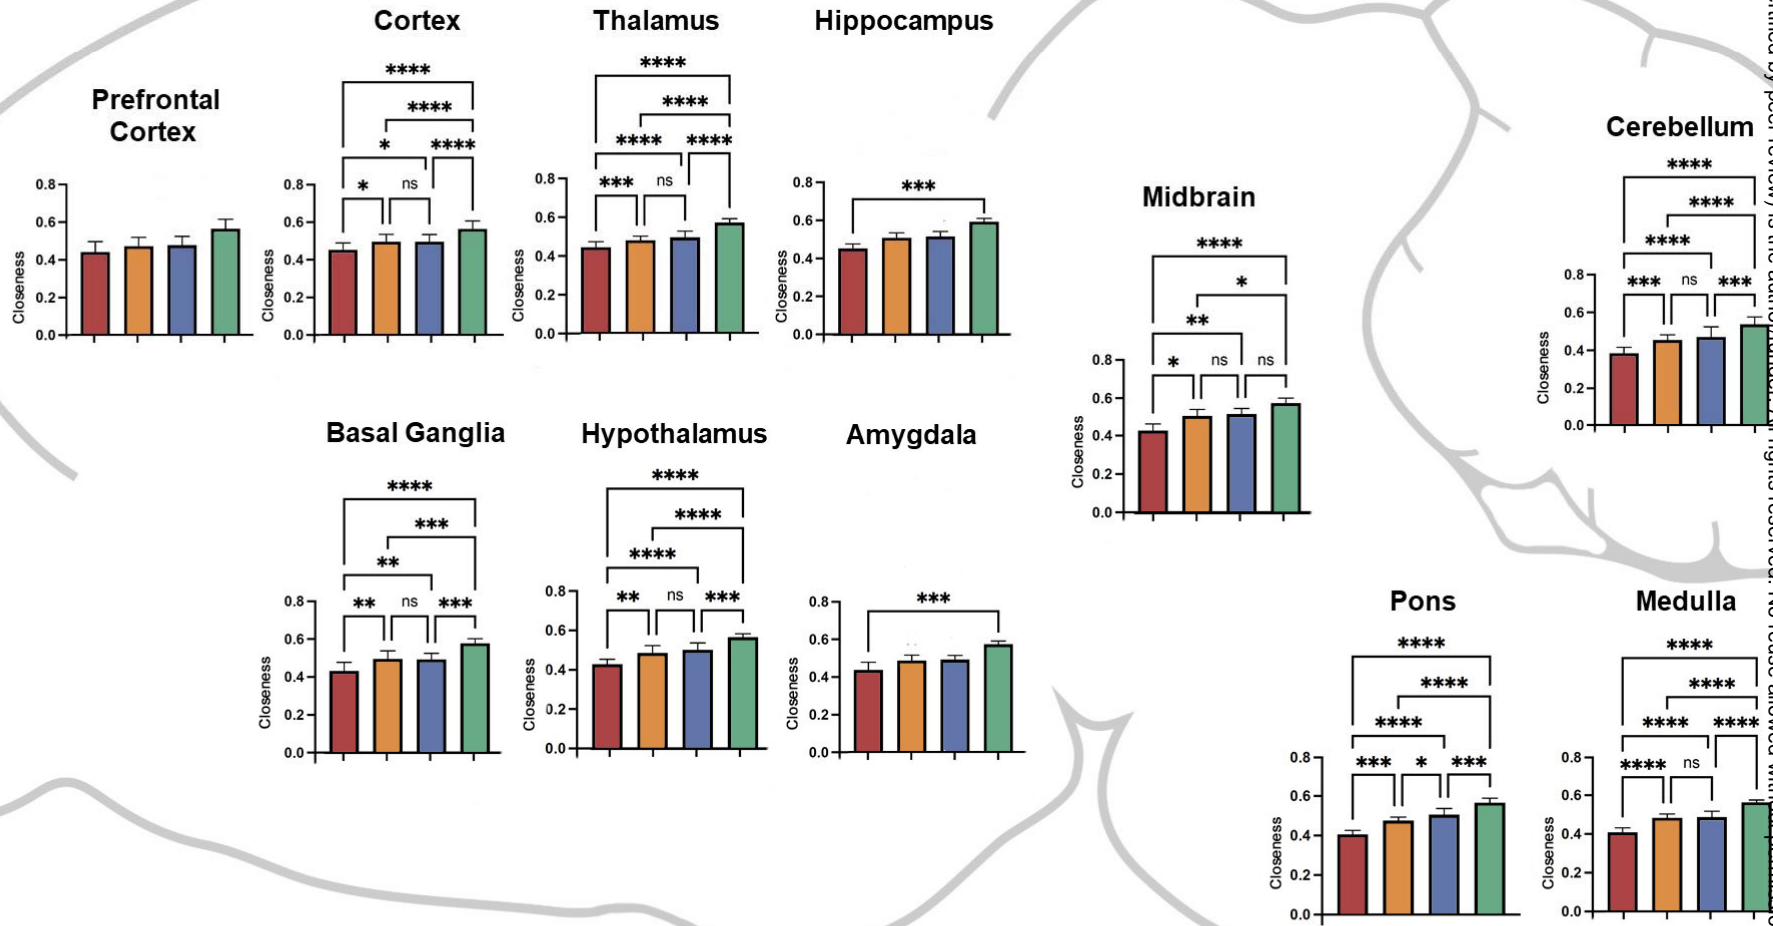

# Degree

CON female

CON male

DXT female

DXT male

factory System

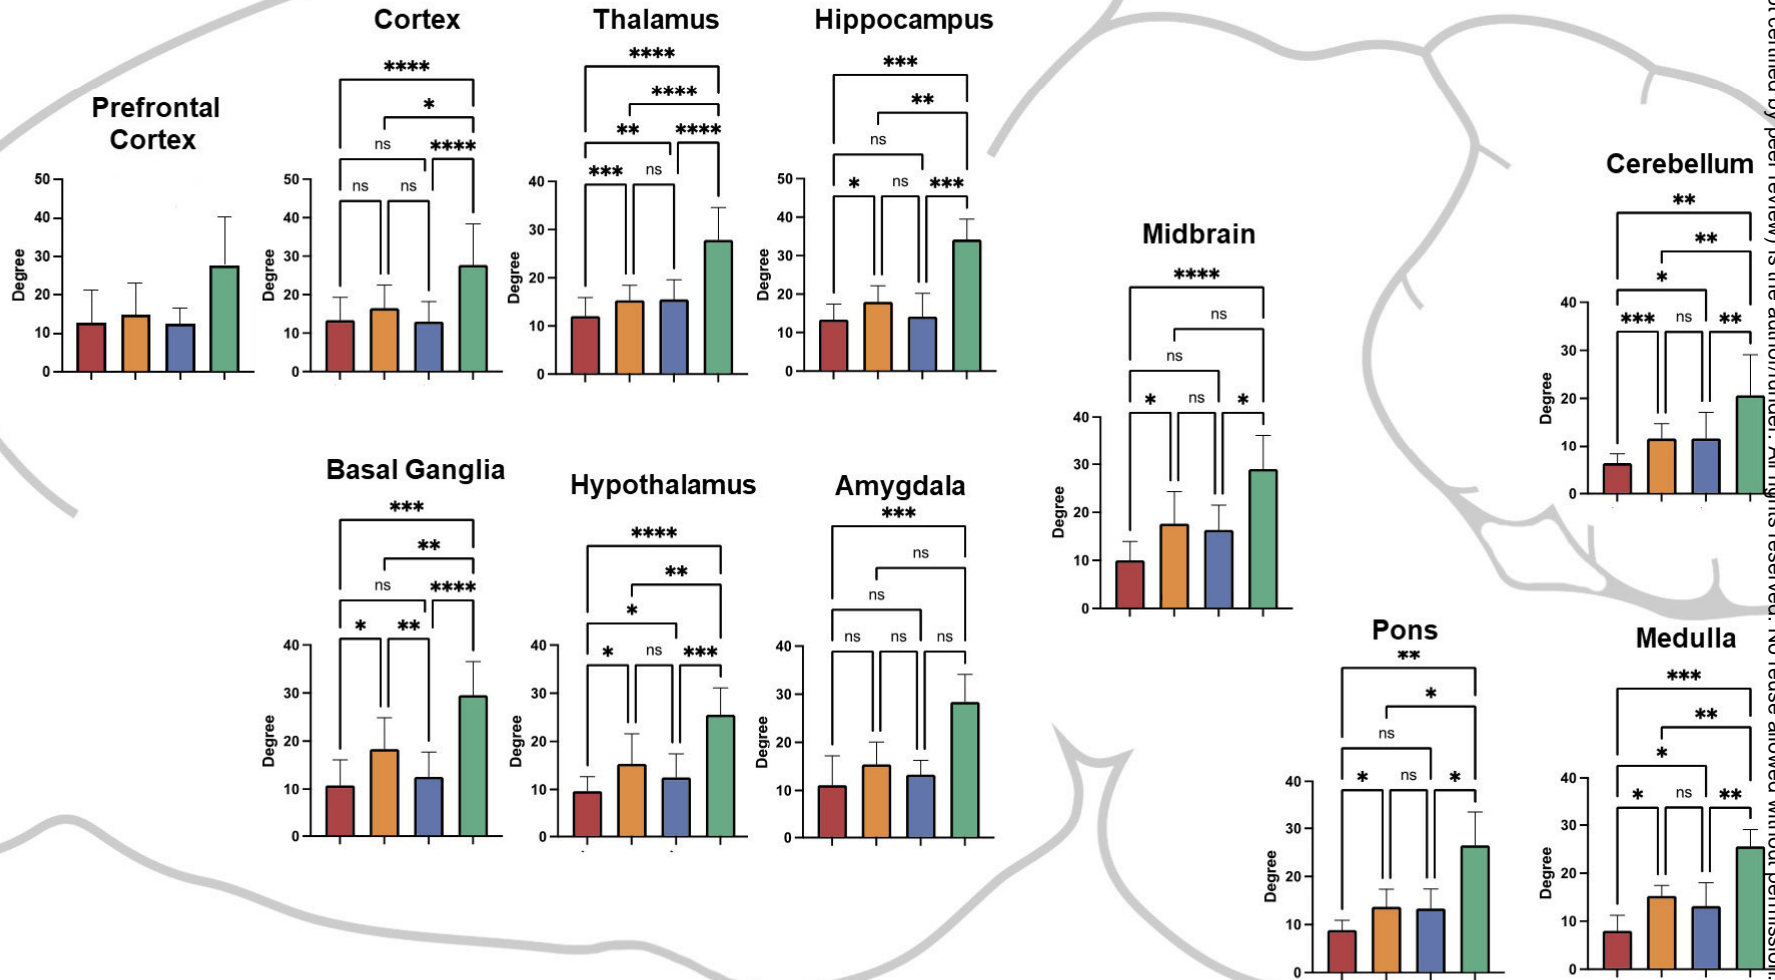

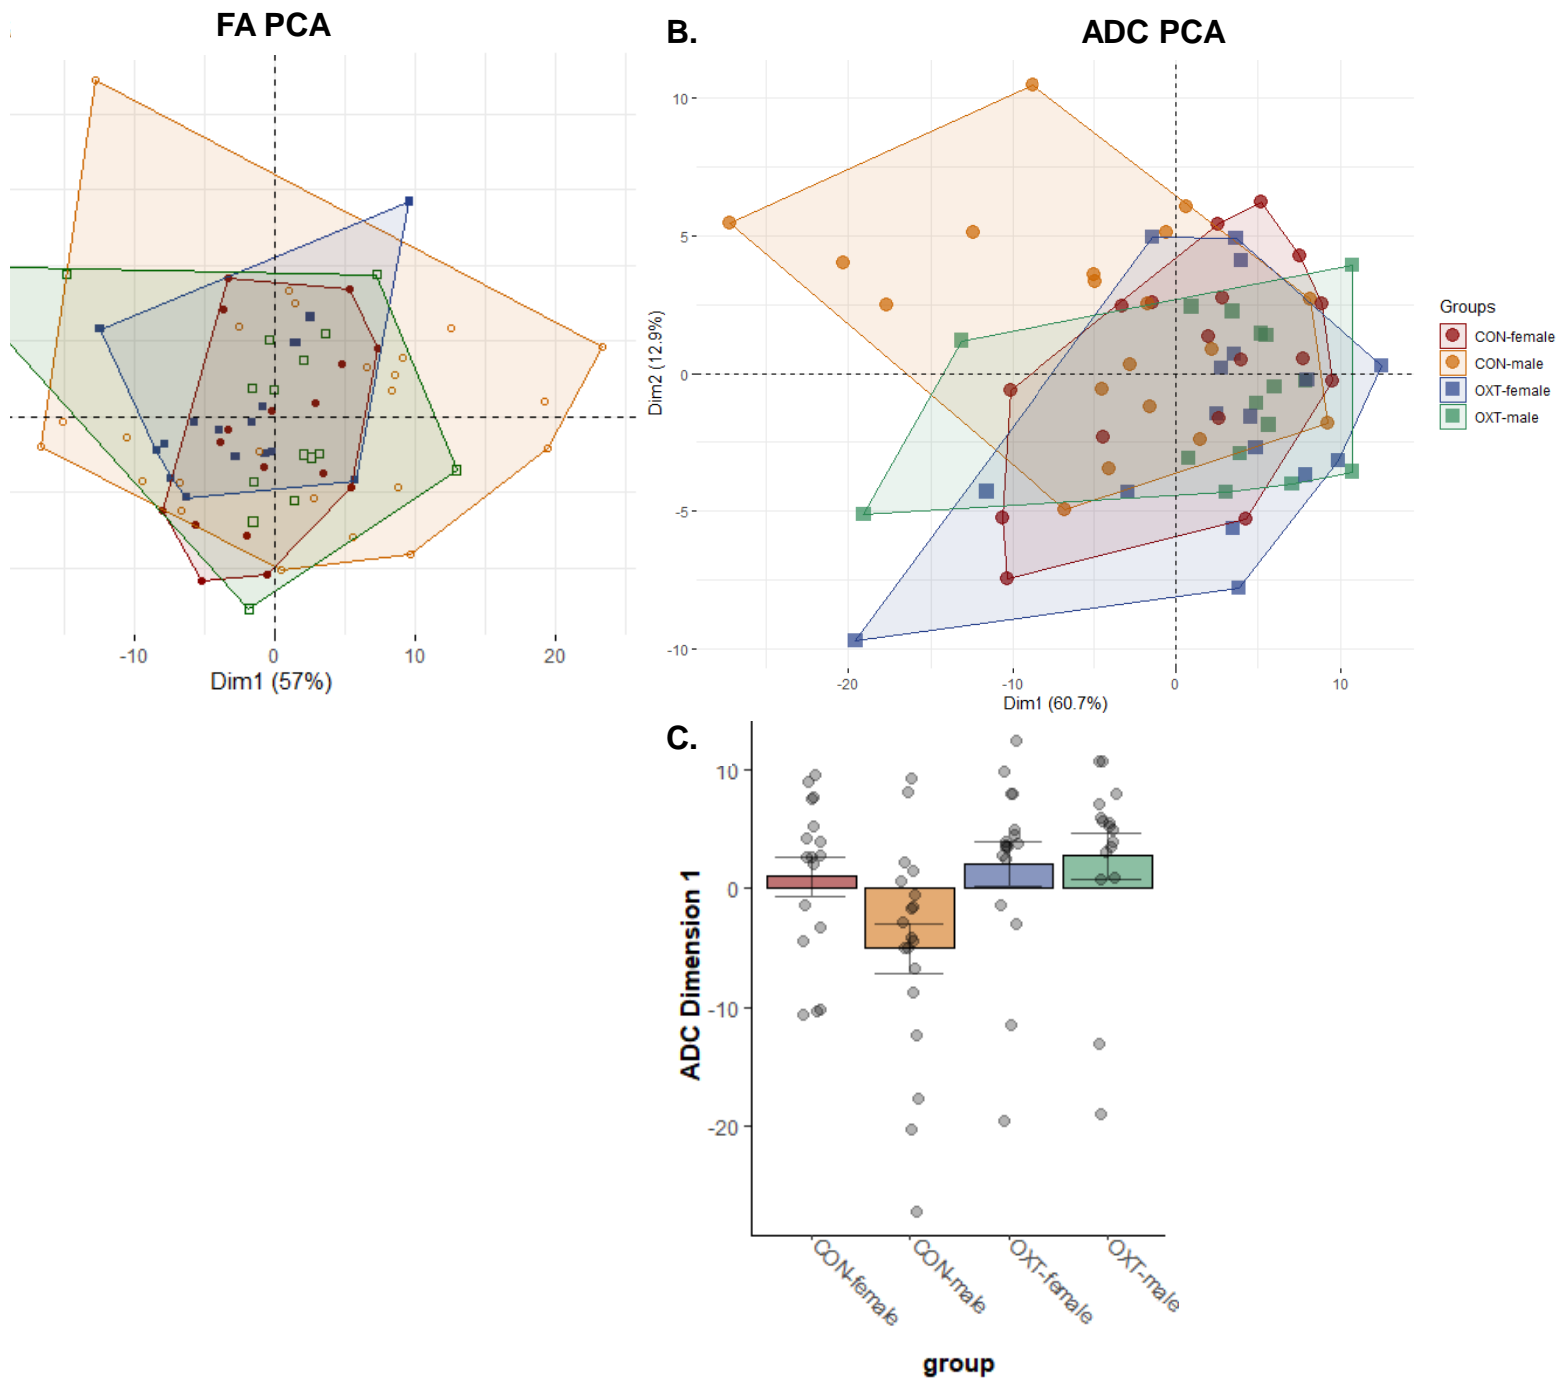



VBM PCA of all groups

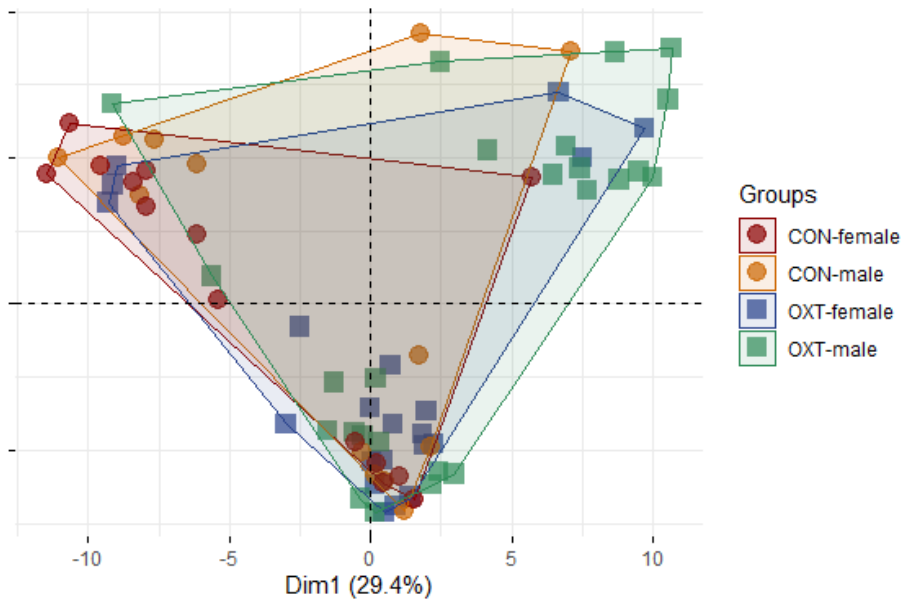

B.

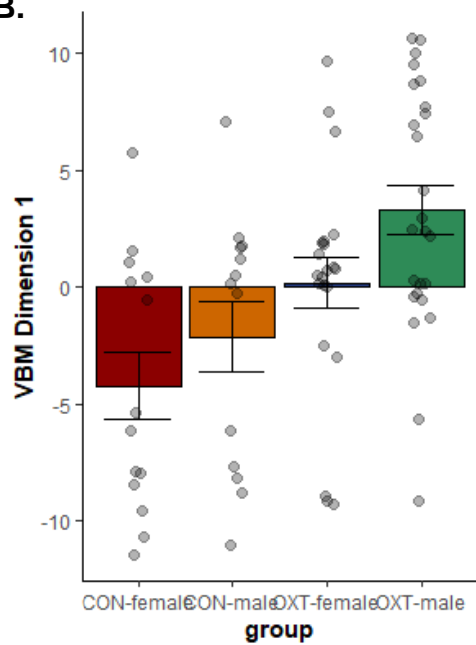

C.

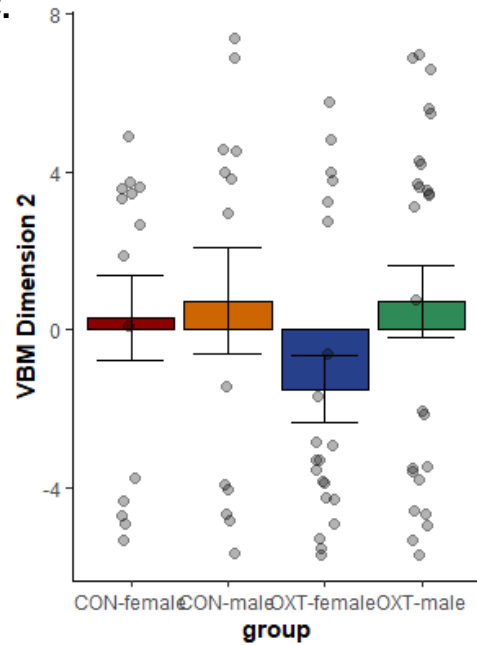

| Apparent Diffusion Coefficient: Control Females and Males |         |      |   |       |      |       |         |
|-----------------------------------------------------------|---------|------|---|-------|------|-------|---------|
| Brain Area                                                | Females |      |   | Males |      | P val | Effect  |
|                                                           | Mean    | SD   |   | Mean  | SD   |       |         |
| cuneate nucleus                                           | 1.27    | 0.11 | < | 1.48  | 0.29 | 0.008 | 0.1919  |
| 9th cerebellar lobule                                     | 1.31    | 0.15 | < | 1.52  | 0.28 | 0.009 | 0.18698 |
| tegmental nucleus                                         | 1.29    | 0.15 | < | 1.49  | 0.16 | 0.000 | 0.18492 |
| 7th cerebellar lobule                                     | 1.13    | 0.09 | < | 1.29  | 0.28 | 0.025 | 0.17274 |
| parafascicular thalamic nucleus                           | 1.24    | 0.11 | < | 1.41  | 0.18 | 0.001 | 0.17138 |
| central medial thalamic nucleus                           | 1.22    | 0.09 | < | 1.40  | 0.18 | 0.001 | 0.17085 |
| dentate gyrus                                             | 1.40    | 0.15 | < | 1.60  | 0.22 | 0.003 | 0.17017 |
| red nucleus                                               | 1.26    | 0.14 | < | 1.44  | 0.19 | 0.003 | 0.16745 |
| perirhinal ctx                                            | 1.34    | 0.15 | < | 1.52  | 0.24 | 0.009 | 0.16346 |
| habenula nucleus                                          | 1.34    | 0.11 | < | 1.52  | 0.24 | 0.009 | 0.15647 |
| central amygdaloid nucleus                                | 1.32    | 0.11 | < | 1.49  | 0.18 | 0.002 | 0.15552 |
| ventral tegmental area                                    | 1.45    | 0.23 | < | 1.64  | 0.30 | 0.045 | 0.15392 |
| reticular nucleus                                         | 1.29    | 0.09 | < | 1.46  | 0.18 | 0.002 | 0.15359 |
| caudate putamen (striatum)                                | 1.23    | 0.09 | < | 1.39  | 0.18 | 0.002 | 0.15305 |
| accumbens core                                            | 1.25    | 0.10 | < | 1.40  | 0.15 | 0.001 | 0.14924 |
| posterior thalamic nucleus                                | 1.24    | 0.11 | < | 1.39  | 0.17 | 0.004 | 0.14636 |
| globus pallidus                                           | 1.22    | 0.10 | < | 1.37  | 0.17 | 0.004 | 0.14432 |
| zona incerta                                              | 1.32    | 0.16 | < | 1.47  | 0.21 | 0.018 | 0.14322 |
| lateral amygdaloid nucleus                                | 1.40    | 0.14 | < | 1.56  | 0.20 | 0.008 | 0.14169 |
| temporal ctx                                              | 1.30    | 0.13 | < | 1.45  | 0.21 | 0.016 | 0.14155 |
| median raphe nucleus                                      | 1.33    | 0.16 | < | 1.48  | 0.21 | 0.019 | 0.13934 |
| parabrachial nucleus                                      | 1.31    | 0.14 | < | 1.46  | 0.17 | 0.008 | 0.13793 |
| medial geniculate                                         | 1.26    | 0.12 | < | 1.40  | 0.17 | 0.007 | 0.13656 |
| basal amygdaloid nucleus                                  | 1.31    | 0.17 | < | 1.45  | 0.18 | 0.021 | 0.13487 |
| pontine reticular nucleus oral                            | 1.34    | 0.21 | < | 1.48  | 0.22 | 0.047 | 0.13411 |
| pretectal nucleus                                         | 1.28    | 0.10 | < | 1.42  | 0.18 | 0.007 | 0.13291 |
| reticular formation                                       | 1.33    | 0.14 | < | 1.47  | 0.19 | 0.015 | 0.13201 |
| claustrum                                                 | 1.23    | 0.11 | < | 1.36  | 0.17 | 0.009 | 0.13179 |
| White Matter                                              | 1.37    | 0.11 | < | 1.51  | 0.20 | 0.011 | 0.13133 |
| reuniens nucleus                                          | 1.28    | 0.13 | < | 1.42  | 0.18 | 0.015 | 0.1309  |
| ventral thalamic nuclei                                   | 1.28    | 0.11 | < | 1.41  | 0.18 | 0.010 | 0.13063 |
| subiculum                                                 | 1.40    | 0.16 | < | 1.55  | 0.20 | 0.021 | 0.12898 |
| dorsal raphe                                              | 1.35    | 0.14 | < | 1.49  | 0.20 | 0.020 | 0.12782 |
| lateral septal nucleus                                    | 1.45    | 0.12 | < | 1.60  | 0.18 | 0.008 | 0.12336 |
| auditory ctx                                              | 1.29    | 0.12 | < | 1.42  | 0.19 | 0.023 | 0.12044 |
| periaqueductal gray                                       | 1.41    | 0.11 | < | 1.55  | 0.22 | 0.027 | 0.11978 |
| lateral posterior thalamic nucleus                        | 1.30    | 0.10 | < | 1.43  | 0.17 | 0.012 | 0.11941 |
| CA3                                                       | 1.39    | 0.13 | < | 1.53  | 0.21 | 0.028 | 0.11874 |
| posterior hypothalamic area                               | 1.32    | 0.17 | < | 1.44  | 0.18 | 0.039 | 0.1185  |
| infralimbic ctx                                           | 1.48    | 0.16 | < | 1.62  | 0.18 | 0.018 | 0.1179  |
| CA1                                                       | 1.40    | 0.12 | < | 1.53  | 0.19 | 0.017 | 0.11749 |

|                                     |             |             |             |             |             |              |                |
|-------------------------------------|-------------|-------------|-------------|-------------|-------------|--------------|----------------|
| <b>bed nucleus stria terminalis</b> | <b>1.30</b> | <b>0.13</b> | <b>&lt;</b> | <b>1.43</b> | <b>0.17</b> | <b>0.019</b> | <b>0.11585</b> |
| <b>orbital ctx</b>                  | <b>1.36</b> | <b>0.14</b> | <b>&lt;</b> | <b>1.48</b> | <b>0.21</b> | <b>0.046</b> | <b>0.11332</b> |
| <b>solitary tract nucleus</b>       | <b>1.30</b> | <b>0.13</b> | <b>&lt;</b> | <b>1.42</b> | <b>0.20</b> | <b>0.044</b> | <b>0.11314</b> |
| <b>paraventricular nuclus</b>       | <b>1.37</b> | <b>0.15</b> | <b>&lt;</b> | <b>1.49</b> | <b>0.16</b> | <b>0.022</b> | <b>0.11212</b> |
| <b>medial septum</b>                | <b>1.34</b> | <b>0.14</b> | <b>&lt;</b> | <b>1.46</b> | <b>0.14</b> | <b>0.022</b> | <b>0.10701</b> |
| <b>lateral geniculate</b>           | <b>1.31</b> | <b>0.11</b> | <b>&lt;</b> | <b>1.42</b> | <b>0.18</b> | <b>0.034</b> | <b>0.10652</b> |
| <b>extended amydala</b>             | <b>1.33</b> | <b>0.15</b> | <b>&lt;</b> | <b>1.44</b> | <b>0.17</b> | <b>0.043</b> | <b>0.10648</b> |

**Fractional Anisotropy: Control Females and Males**

| Brain Area                         | Females (n=17) |      | > | Males (n=19) |      | P val | Effect  |
|------------------------------------|----------------|------|---|--------------|------|-------|---------|
|                                    | Mean           | SD   |   | Mean         | SD   |       |         |
| parafascicular thalamic nucleus    | 0.48           | 0.06 | > | 0.39         | 0.07 | 0.000 | 0.32447 |
| habenula nucleus                   | 0.49           | 0.07 | > | 0.41         | 0.08 | 0.001 | 0.29116 |
| lateral geniculate                 | 0.56           | 0.05 | > | 0.47         | 0.07 | 0.000 | 0.26107 |
| bed nucleus stria terminalis       | 0.48           | 0.04 | > | 0.41         | 0.05 | 0.000 | 0.26013 |
| diagonal band of Broca             | 0.48           | 0.04 | > | 0.40         | 0.08 | 0.002 | 0.24076 |
| claustrum                          | 0.47           | 0.06 | > | 0.40         | 0.06 | 0.003 | 0.2303  |
| lateral dorsal thalamic nucleus    | 0.58           | 0.05 | > | 0.51         | 0.10 | 0.005 | 0.21017 |
| glomerular layer olfactory bulb    | 0.48           | 0.03 | > | 0.42         | 0.07 | 0.002 | 0.19975 |
| lateral amygdaloid nucleus         | 0.50           | 0.08 | > | 0.43         | 0.08 | 0.020 | 0.19807 |
| granular cell layer olfactory bulb | 0.46           | 0.04 | > | 0.40         | 0.07 | 0.004 | 0.197   |
| central medial thalamic nucleus    | 0.51           | 0.06 | > | 0.44         | 0.08 | 0.010 | 0.19131 |
| pretectal nucleus                  | 0.48           | 0.04 | > | 0.42         | 0.06 | 0.001 | 0.19005 |
| ventral tegmental area             | 0.57           | 0.06 | > | 0.50         | 0.07 | 0.003 | 0.18642 |
| anterior olfactory nucleus         | 0.48           | 0.03 | > | 0.42         | 0.06 | 0.001 | 0.1821  |
| medial geniculate                  | 0.52           | 0.04 | > | 0.46         | 0.08 | 0.005 | 0.18048 |
| olfactory tubercles                | 0.52           | 0.03 | > | 0.46         | 0.07 | 0.002 | 0.17889 |
| 6th cerebellar lobule              | 0.48           | 0.05 | > | 0.42         | 0.06 | 0.003 | 0.178   |
| medial preoptic area               | 0.51           | 0.03 | > | 0.45         | 0.08 | 0.006 | 0.17754 |
| caudate putamen (striatum)         | 0.47           | 0.05 | > | 0.41         | 0.06 | 0.008 | 0.17608 |
| posterior hypothalamic area        | 0.54           | 0.07 | > | 0.48         | 0.05 | 0.005 | 0.17523 |
| orbital ctx                        | 0.45           | 0.04 | > | 0.40         | 0.06 | 0.006 | 0.17508 |
| tegmental nucleus                  | 0.55           | 0.08 | > | 0.49         | 0.07 | 0.017 | 0.17139 |
| reuniens nucleus                   | 0.54           | 0.06 | > | 0.48         | 0.07 | 0.008 | 0.17084 |
| dorsal raphe                       | 0.52           | 0.07 | > | 0.46         | 0.08 | 0.024 | 0.17039 |
| tenia tecta ctx                    | 0.51           | 0.03 | > | 0.45         | 0.07 | 0.005 | 0.17023 |
| red nucleus                        | 0.53           | 0.06 | > | 0.47         | 0.07 | 0.010 | 0.16899 |
| medial septum                      | 0.48           | 0.07 | > | 0.43         | 0.07 | 0.035 | 0.16893 |
| CA1                                | 0.51           | 0.04 | > | 0.45         | 0.06 | 0.003 | 0.16838 |
| posterior thalamic nucleus         | 0.52           | 0.03 | > | 0.46         | 0.07 | 0.004 | 0.16653 |
| anterior thalamic nuclei           | 0.45           | 0.05 | > | 0.40         | 0.06 | 0.013 | 0.16469 |
| substantia nigra                   | 0.60           | 0.05 | > | 0.53         | 0.06 | 0.002 | 0.16259 |
| secondary somatosensory ctx        | 0.45           | 0.05 | > | 0.40         | 0.07 | 0.027 | 0.15839 |
| lateral posterior thalamic nucleus | 0.51           | 0.06 | > | 0.45         | 0.07 | 0.025 | 0.15525 |
| CA3                                | 0.53           | 0.04 | > | 0.47         | 0.07 | 0.007 | 0.15272 |
| reticular formation                | 0.52           | 0.05 | > | 0.47         | 0.06 | 0.012 | 0.15052 |
| dorsal medial nucleus              | 0.53           | 0.06 | > | 0.48         | 0.07 | 0.020 | 0.14557 |
| accumbens core                     | 0.53           | 0.04 | > | 0.48         | 0.06 | 0.003 | 0.14454 |
| subiculum                          | 0.49           | 0.04 | > | 0.45         | 0.06 | 0.011 | 0.13942 |
| dentate gyrus                      | 0.49           | 0.04 | > | 0.45         | 0.07 | 0.015 | 0.13789 |
| ventral pallidum                   | 0.53           | 0.04 | > | 0.48         | 0.06 | 0.008 | 0.13773 |
| superior colliculus                | 0.44           | 0.04 | > | 0.40         | 0.06 | 0.019 | 0.13266 |

|                                |      |      |   |      |      |       |         |
|--------------------------------|------|------|---|------|------|-------|---------|
| lateral preoptic area          | 0.56 | 0.04 | > | 0.51 | 0.08 | 0.023 | 0.1326  |
| extended amygdala              | 0.52 | 0.06 | > | 0.47 | 0.06 | 0.020 | 0.13195 |
| parasubiculum                  | 0.44 | 0.04 | > | 0.40 | 0.07 | 0.037 | 0.13104 |
| median raphe nucleus           | 0.59 | 0.05 | > | 0.54 | 0.08 | 0.026 | 0.13094 |
| interpeduncular nucleus        | 0.54 | 0.05 | > | 0.50 | 0.05 | 0.011 | 0.13013 |
| 7th cerebellar lobule          | 0.52 | 0.05 | > | 0.47 | 0.06 | 0.022 | 0.13013 |
| accumbens shell                | 0.52 | 0.05 | > | 0.48 | 0.06 | 0.018 | 0.12372 |
| zona incerta                   | 0.64 | 0.05 | > | 0.58 | 0.07 | 0.018 | 0.11986 |
| central amygdaloid nucleus     | 0.53 | 0.06 | > | 0.49 | 0.07 | 0.049 | 0.11951 |
| 8th cerebellar lobule          | 0.53 | 0.05 | > | 0.49 | 0.05 | 0.018 | 0.11938 |
| endopiriform nucleus           | 0.49 | 0.06 | > | 0.45 | 0.05 | 0.046 | 0.11912 |
| parabrachial nucleus           | 0.54 | 0.05 | > | 0.50 | 0.06 | 0.024 | 0.1173  |
| paraventricular nucleus        | 0.55 | 0.06 | > | 0.50 | 0.07 | 0.040 | 0.11618 |
| basal amygdaloid nucleus       | 0.56 | 0.05 | > | 0.51 | 0.07 | 0.046 | 0.11537 |
| ventral thalamic nuclei        | 0.55 | 0.04 | > | 0.51 | 0.06 | 0.020 | 0.1152  |
| 9th cerebellar lobule          | 0.53 | 0.06 | > | 0.49 | 0.05 | 0.040 | 0.10817 |
| pontine reticular nucleus oral | 0.55 | 0.05 | > | 0.51 | 0.06 | 0.027 | 0.1075  |
| cortical amygdaloid nucleus    | 0.53 | 0.04 | > | 0.50 | 0.06 | 0.040 | 0.10125 |
| trigeminal complex medulla     | 0.53 | 0.02 | > | 0.49 | 0.05 | 0.007 | 0.09908 |
| reticulotegmental nucleus      | 0.55 | 0.05 | > | 0.51 | 0.05 | 0.041 | 0.09501 |
| crus ansiform lobule           | 0.50 | 0.04 | > | 0.47 | 0.05 | 0.040 | 0.08962 |

| <b>Fractional Anisotropy: Control Females vs Oxytocin Females</b> |                       |               |                        |               |               |                |
|-------------------------------------------------------------------|-----------------------|---------------|------------------------|---------------|---------------|----------------|
| <b>Brain Area</b>                                                 | <b>Female Control</b> |               | <b>Female Oxytocin</b> |               | <b>P val</b>  | <b>Effect</b>  |
|                                                                   | <b>Mean</b>           | <b>SD</b>     | <b>Mean</b>            | <b>SD</b>     |               |                |
| <b>3rd cerebellar lobule</b>                                      | <b>0.4825</b>         | <b>0.0609</b> | <b>0.5259</b>          | <b>0.0582</b> | <b>0.0235</b> | <b>0.11782</b> |
| <b>5th cerebellar lobule</b>                                      | <b>0.489</b>          | <b>0.0585</b> | <b>0.5273</b>          | <b>0.0573</b> | <b>0.0388</b> | <b>0.10367</b> |
| <b>anterior cingulate ctx</b>                                     | <b>0.478</b>          | <b>0.0515</b> | <b>0.5141</b>          | <b>0.0609</b> | <b>0.044</b>  | <b>0.10039</b> |
| <b>inferior colliculus</b>                                        | <b>0.4405</b>         | <b>0.0436</b> | <b>0.4718</b>          | <b>0.0561</b> | <b>0.0492</b> | <b>0.09499</b> |
| <b>auditory ctx</b>                                               | <b>0.4565</b>         | <b>0.0437</b> | <b>0.4886</b>          | <b>0.0457</b> | <b>0.025</b>  | <b>0.09415</b> |

| Apparent Diffusion Coefficient: Control Males vs Oxytocin Males |               |      |   |                |      |       |         |
|-----------------------------------------------------------------|---------------|------|---|----------------|------|-------|---------|
| Brain Area                                                      | Males Control |      | > | Males Oxytocin |      | P val | Effect  |
|                                                                 | Mean          | SD   |   | Mean           | SD   |       |         |
| periaqueductal gray                                             | 1.55          | 0.22 | > | 1.31           | 0.14 | 0.000 | 0.25266 |
| tegmental nucleus                                               | 1.49          | 0.16 | > | 1.26           | 0.13 | 0.000 | 0.24327 |
| vestibular nucleus                                              | 1.48          | 0.16 | > | 1.26           | 0.15 | 0.000 | 0.22849 |
| dorsal raphe                                                    | 1.49          | 0.20 | > | 1.28           | 0.14 | 0.000 | 0.22449 |
| Ventricle                                                       | 1.79          | 0.22 | > | 1.62           | 0.11 | 0.000 | 0.14191 |
| parafascicular thalamic nucleus                                 | 1.41          | 0.18 | > | 1.22           | 0.12 | 0.000 | 0.22109 |
| reuniens nucleus                                                | 1.42          | 0.18 | > | 1.22           | 0.14 | 0.000 | 0.22122 |
| paraventricular nuclus                                          | 1.49          | 0.16 | > | 1.29           | 0.13 | 0.000 | 0.21074 |
| posterior thalamic nucleus                                      | 1.39          | 0.17 | > | 1.21           | 0.13 | 0.000 | 0.20552 |
| superior colliculus                                             | 1.45          | 0.19 | > | 1.26           | 0.13 | 0.000 | 0.20326 |
| ventral thalamic nuclei                                         | 1.41          | 0.18 | > | 1.23           | 0.14 | 0.000 | 0.19862 |
| CA3                                                             | 1.53          | 0.21 | > | 1.33           | 0.15 | 0.000 | 0.20163 |
| central amygdaloid nucleus                                      | 1.49          | 0.18 | > | 1.31           | 0.14 | 0.000 | 0.19427 |
| central medial thalamic nucleus                                 | 1.40          | 0.18 | > | 1.22           | 0.12 | 0.000 | 0.19809 |
| lateral amygdaloid nucleus                                      | 1.56          | 0.20 | > | 1.39           | 0.13 | 0.000 | 0.17413 |
| medial dorsal thalamic nucleus                                  | 1.40          | 0.19 | > | 1.22           | 0.14 | 0.000 | 0.20071 |
| pretectal nucleus                                               | 1.42          | 0.18 | > | 1.25           | 0.12 | 0.000 | 0.18295 |
| secondary somaotsensory ctx                                     | 1.42          | 0.17 | > | 1.27           | 0.13 | 0.000 | 0.16995 |
| medial geniculate                                               | 1.40          | 0.17 | > | 1.24           | 0.14 | 0.000 | 0.18186 |
| bed nucleus stria terminalis                                    | 1.43          | 0.17 | > | 1.26           | 0.13 | 0.000 | 0.18427 |
| accumbens core                                                  | 1.40          | 0.15 | > | 1.24           | 0.12 | 0.000 | 0.17873 |
| CA1                                                             | 1.53          | 0.19 | > | 1.36           | 0.15 | 0.000 | 0.17772 |
| lateral dorsal thalamic nucleus                                 | 1.48          | 0.18 | > | 1.32           | 0.13 | 0.000 | 0.16654 |
| parabrachial nucleus                                            | 1.46          | 0.17 | > | 1.30           | 0.16 | 0.000 | 0.16313 |
| lateral posterior thalamic nucleus                              | 1.43          | 0.17 | > | 1.26           | 0.14 | 0.000 | 0.17875 |
| red nucleus                                                     | 1.44          | 0.19 | > | 1.27           | 0.14 | 0.000 | 0.18789 |
| primary somatosensory ctx                                       | 1.55          | 0.21 | > | 1.39           | 0.17 | 0.001 | 0.15046 |
| reticular nucleus                                               | 1.46          | 0.18 | > | 1.29           | 0.13 | 0.001 | 0.17881 |
| inferior colliculus                                             | 1.50          | 0.21 | > | 1.30           | 0.14 | 0.001 | 0.20488 |
| habenula nucleus                                                | 1.52          | 0.24 | > | 1.35           | 0.19 | 0.001 | 0.16646 |
| medial septum                                                   | 1.46          | 0.14 | > | 1.29           | 0.13 | 0.001 | 0.17305 |
| paraventricular nucleus                                         | 1.40          | 0.19 | > | 1.23           | 0.17 | 0.001 | 0.18977 |
| White Matter                                                    | 1.51          | 0.20 | > | 1.35           | 0.15 | 0.001 | 0.16027 |
| lateral geniculate                                              | 1.42          | 0.18 | > | 1.25           | 0.13 | 0.001 | 0.17768 |
| 2nd cerebellar lobule                                           | 1.47          | 0.20 | > | 1.30           | 0.21 | 0.001 | 0.17439 |
| caudate putamen (striatum)                                      | 1.39          | 0.18 | > | 1.23           | 0.12 | 0.001 | 0.16938 |
| claustrum                                                       | 1.36          | 0.17 | > | 1.21           | 0.11 | 0.001 | 0.16714 |
| anterior thalamic nuclei                                        | 1.40          | 0.18 | > | 1.24           | 0.15 | 0.001 | 0.17436 |
| median raphe nucleus                                            | 1.48          | 0.21 | > | 1.33           | 0.17 | 0.001 | 0.14888 |
| reticular formation                                             | 1.47          | 0.19 | > | 1.31           | 0.19 | 0.001 | 0.16269 |
| accumbens shell                                                 | 1.43          | 0.16 | > | 1.26           | 0.14 | 0.002 | 0.18139 |

|                                    |      |      |   |      |      |       |         |
|------------------------------------|------|------|---|------|------|-------|---------|
| auditory ctx                       | 1.42 | 0.19 | > | 1.27 | 0.16 | 0.002 | 0.1609  |
| globus pallidus                    | 1.37 | 0.17 | > | 1.21 | 0.14 | 0.002 | 0.17193 |
| orbital ctx                        | 1.48 | 0.21 | > | 1.31 | 0.14 | 0.003 | 0.17342 |
| infralimbic ctx                    | 1.62 | 0.18 | > | 1.44 | 0.16 | 0.003 | 0.16252 |
| 7th cerebellar lobule              | 1.29 | 0.28 | > | 1.08 | 0.18 | 0.003 | 0.26364 |
| visual 1 ctx                       | 1.50 | 0.25 | > | 1.34 | 0.19 | 0.003 | 0.15891 |
| anterior olfactory nucleus         | 1.57 | 0.30 | > | 1.35 | 0.22 | 0.003 | 0.21393 |
| 10th cerebellar lobule             | 1.62 | 0.25 | > | 1.43 | 0.17 | 0.003 | 0.18096 |
| dentate gyrus                      | 1.60 | 0.22 | > | 1.41 | 0.19 | 0.003 | 0.18057 |
| agranular insular ctx              | 1.45 | 0.17 | > | 1.30 | 0.23 | 0.004 | 0.1574  |
| 5th cerebellar lobule              | 1.25 | 0.24 | > | 1.07 | 0.19 | 0.004 | 0.22931 |
| extended amygdala                  | 1.44 | 0.17 | > | 1.29 | 0.17 | 0.004 | 0.15247 |
| 3rd cerebellar lobule              | 1.30 | 0.22 | > | 1.13 | 0.21 | 0.004 | 0.20307 |
| endopiriform nucleus               | 1.40 | 0.18 | > | 1.26 | 0.18 | 0.005 | 0.15393 |
| 6th cerebellar lobule              | 1.24 | 0.23 | > | 1.03 | 0.18 | 0.005 | 0.26201 |
| parasubiculum                      | 1.57 | 0.28 | > | 1.42 | 0.21 | 0.005 | 0.14979 |
| subiculum                          | 1.55 | 0.20 | > | 1.40 | 0.24 | 0.007 | 0.13718 |
| frontal association ctx            | 1.58 | 0.24 | > | 1.43 | 0.19 | 0.008 | 0.15083 |
| zona incerta                       | 1.47 | 0.21 | > | 1.31 | 0.22 | 0.011 | 0.17364 |
| temporal ctx                       | 1.45 | 0.21 | > | 1.30 | 0.22 | 0.012 | 0.15813 |
| lateral septal nucleus             | 1.60 | 0.18 | > | 1.48 | 0.12 | 0.012 | 0.10938 |
| primary motor ctx                  | 1.60 | 0.27 | > | 1.49 | 0.19 | 0.014 | 0.09447 |
| visual 2 ctx                       | 1.66 | 0.31 | > | 1.52 | 0.20 | 0.015 | 0.12248 |
| ventral pallidum                   | 1.47 | 0.18 | > | 1.32 | 0.18 | 0.015 | 0.15104 |
| pontine reticular nucleus oral     | 1.48 | 0.22 | > | 1.36 | 0.27 | 0.016 | 0.12224 |
| solitary tract nucleus             | 1.42 | 0.20 | > | 1.28 | 0.21 | 0.016 | 0.14862 |
| retrosplenial ctx                  | 1.77 | 0.33 | > | 1.64 | 0.22 | 0.016 | 0.10686 |
| basal amygdaloid nucleus           | 1.45 | 0.18 | > | 1.30 | 0.23 | 0.022 | 0.16251 |
| anterior hypothalamic area         | 1.55 | 0.23 | > | 1.39 | 0.27 | 0.023 | 0.1591  |
| 9th cerebellar lobule              | 1.52 | 0.28 | > | 1.33 | 0.19 | 0.024 | 0.18827 |
| posterior hypothalamic area        | 1.44 | 0.18 | > | 1.28 | 0.16 | 0.024 | 0.17083 |
| medial preoptic area               | 1.57 | 0.25 | > | 1.41 | 0.23 | 0.024 | 0.15719 |
| diagonal band of Broca             | 1.53 | 0.22 | > | 1.40 | 0.21 | 0.025 | 0.13414 |
| pontine reticular nucleus caudal   | 1.49 | 0.22 | > | 1.38 | 0.34 | 0.025 | 0.1033  |
| perirhinal ctx                     | 1.52 | 0.24 | > | 1.36 | 0.31 | 0.028 | 0.16618 |
| anterior cingulate ctx             | 1.75 | 0.24 | > | 1.58 | 0.20 | 0.028 | 0.14404 |
| crus ansiform lobule               | 1.36 | 0.24 | > | 1.23 | 0.23 | 0.029 | 0.1512  |
| 8th cerebellar lobule              | 1.38 | 0.29 | > | 1.23 | 0.24 | 0.034 | 0.1625  |
| gigantocellular reticular nucleus  | 1.53 | 0.26 | > | 1.43 | 0.38 | 0.036 | 0.10108 |
| granular cell layer olfactory bulb | 1.56 | 0.30 | > | 1.40 | 0.16 | 0.040 | 0.16061 |
| cuneate nucleus                    | 1.48 | 0.29 | > | 1.34 | 0.25 | 0.042 | 0.14091 |
| dorsal medial nucleus              | 1.64 | 0.25 | > | 1.51 | 0.20 | 0.046 | 0.11454 |
| medial amygdaloid nucleus          | 1.68 | 0.25 | > | 1.52 | 0.34 | 0.049 | 0.13551 |



| Fractional Anisotropy: Control Males vs Oxytocin Males |               |      |   |                |      |       |         |
|--------------------------------------------------------|---------------|------|---|----------------|------|-------|---------|
| Brain Area                                             | Males Control |      |   | Males Oxytocin |      | P val | Effect  |
|                                                        | Mean          | SD   |   | Mean           | SD   |       |         |
| medial preoptic area                                   | 0.47          | 0.06 | < | 0.52           | 0.06 | 0.004 | 0.1249  |
| pontine nuclei                                         | 0.50          | 0.07 | < | 0.53           | 0.04 | 0.001 | 0.09148 |
| medial geniculate                                      | 0.55          | 0.06 | < | 0.59           | 0.05 | 0.024 | 0.07966 |
| median raphe nucleus                                   | 0.52          | 0.05 | < | 0.56           | 0.06 | 0.015 | 0.07972 |
| lateral geniculate                                     | 0.52          | 0.06 | < | 0.56           | 0.05 | 0.009 | 0.08229 |
| parabrachial nucleus                                   | 0.51          | 0.03 | < | 0.53           | 0.05 | 0.012 | 0.05862 |
| lateral dorsal thalamic nucleus                        | 0.50          | 0.06 | < | 0.53           | 0.05 | 0.005 | 0.079   |
| reticular formation                                    | 0.52          | 0.05 | < | 0.54           | 0.05 | 0.002 | 0.0676  |
| lemniscal nucleus                                      | 0.55          | 0.03 | < | 0.57           | 0.04 | 0.002 | 0.04745 |
| anterior olfactory nucleus                             | 0.48          | 0.07 | < | 0.51           | 0.03 | 0.023 | 0.07136 |
| 3rd cerebellar lobule                                  | 0.51          | 0.04 | < | 0.53           | 0.04 | 0.001 | 0.04758 |
| ventral pallidum                                       | 0.46          | 0.04 | < | 0.49           | 0.06 | 0.026 | 0.07166 |
| ventral medial nucleus                                 | 0.56          | 0.05 | > | 0.53           | 0.05 | 0.015 | 0.06245 |
| reuniens nucleus                                       | 0.48          | 0.05 | < | 0.51           | 0.05 | 0.043 | 0.06446 |
| trigeminal complex pons                                | 0.51          | 0.06 | < | 0.53           | 0.06 | 0.007 | 0.06633 |
| agranular insular ctx                                  | 0.55          | 0.06 | < | 0.57           | 0.04 | 0.014 | 0.05201 |
| cortical amygdaloid nucleus                            | 0.52          | 0.06 | < | 0.54           | 0.05 | 0.037 | 0.05807 |
| auditory ctx                                           | 0.49          | 0.04 | < | 0.51           | 0.04 | 0.049 | 0.04631 |
| medial amygdaloid nucleus                              | 0.47          | 0.06 | > | 0.44           | 0.08 | 0.032 | 0.08558 |
| periaqueductal gray                                    | 0.51          | 0.06 | < | 0.53           | 0.06 | 0.023 | 0.05655 |
| ventral thalamic nuclei                                | 0.50          | 0.05 | < | 0.53           | 0.07 | 0.027 | 0.05859 |
| 2nd cerebellar lobule                                  | 0.47          | 0.05 | < | 0.50           | 0.08 | 0.005 | 0.06362 |
| posterior thalamic nucleus                             | 0.52          | 0.06 | < | 0.54           | 0.04 | 0.006 | 0.04344 |
| paraventricular nucleus, hypothalamus                  | 0.48          | 0.06 | < | 0.50           | 0.07 | 0.009 | 0.05594 |
| superior colliculus                                    | 0.45          | 0.04 | < | 0.46           | 0.06 | 0.012 | 0.05009 |
| reticulotegmental nucleus                              | 0.53          | 0.05 | < | 0.54           | 0.04 | 0.009 | 0.03172 |
| frontal association ctx                                | 0.53          | 0.05 | < | 0.55           | 0.05 | 0.049 | 0.0364  |
| prelimbic ctx                                          | 0.53          | 0.05 | < | 0.54           | 0.04 | 0.047 | 0.02827 |
| olivary nucleus                                        | 0.48          | 0.06 | < | 0.50           | 0.05 | 0.036 | 0.04071 |
| central medial thalamic nucleus                        | 0.52          | 0.05 | < | 0.54           | 0.06 | 0.017 | 0.0384  |
| Ventricle                                              | 0.52          | 0.06 | < | 0.54           | 0.06 | 0.029 | 0.04214 |
| reticular nucleus                                      | 0.48          | 0.07 | < | 0.50           | 0.05 | 0.033 | 0.04473 |
| lateral preoptic area                                  | 0.52          | 0.05 | < | 0.53           | 0.04 | 0.001 | 0.03037 |
| tegmental nucleus                                      | 0.50          | 0.05 | < | 0.52           | 0.07 | 0.011 | 0.03654 |
| CA3                                                    | 0.49          | 0.04 | < | 0.50           | 0.04 | 0.024 | 0.02462 |
| lateral amygdaloid nucleus                             | 0.50          | 0.04 | < | 0.51           | 0.07 | 0.028 | 0.03662 |
| nucleus lateral olfactory tract                        | 0.46          | 0.04 | < | 0.47           | 0.06 | 0.047 | 0.02991 |
| medial dorsal thalamic nucleus                         | 0.48          | 0.04 | < | 0.48           | 0.06 | 0.040 | 0.0247  |
| subiculum                                              | 0.53          | 0.05 | < | 0.54           | 0.04 | 0.014 | 0.01905 |
| 8th cerebellar lobule                                  | 0.49          | 0.05 | < | 0.50           | 0.06 | 0.029 | 0.02393 |
| CA1                                                    | 0.48          | 0.03 | < | 0.49           | 0.06 | 0.042 | 0.0192  |
| lateral septal nucleus                                 | 0.52          | 0.08 | < | 0.53           | 0.07 | 0.011 | 0.02664 |
| accumbens shell                                        | 0.51          | 0.06 | < | 0.52           | 0.06 | 0.012 | 0.02132 |

|                            |      |      |   |      |      |       |         |
|----------------------------|------|------|---|------|------|-------|---------|
| entorhinal ctx             | 0.45 | 0.05 | < | 0.46 | 0.07 | 0.017 | 0.02447 |
| paraflocculus cerebellum   | 0.50 | 0.03 | > | 0.49 | 0.07 | 0.047 | 0.01945 |
| extended amygdala          | 0.53 | 0.05 | < | 0.54 | 0.04 | 0.003 | 0.01581 |
| inferior colliculus        | 0.47 | 0.04 | < | 0.47 | 0.07 | 0.008 | 0.02053 |
| endopiriform nucleus       | 0.44 | 0.05 | < | 0.44 | 0.07 | 0.041 | 0.02301 |
| visual 2 ctx               | 0.53 | 0.08 | < | 0.54 | 0.06 | 0.045 | 0.01821 |
| substantia nigra           | 0.52 | 0.06 | < | 0.52 | 0.05 | 0.010 | 0.01221 |
| central amygdaloid nucleus | 0.45 | 0.04 | < | 0.45 | 0.06 | 0.037 | 0.01297 |
| olfactory tubercles        | 0.49 | 0.08 | < | 0.50 | 0.07 | 0.034 | 0.01172 |
| retrosplenial ctx          | 0.50 | 0.03 | > | 0.50 | 0.06 | 0.024 | 0.00761 |
| 7th cerebellar lobule      | 0.49 | 0.06 | < | 0.50 | 0.06 | 0.046 | 0.00868 |
| lateral hypothalamus       | 0.45 | 0.05 | < | 0.45 | 0.07 | 0.033 | 0.00705 |
| diagonal band of Broca     | 0.50 | 0.04 | < | 0.50 | 0.05 | 0.007 | 0.00393 |
| mammillary nucleus         | 0.46 | 0.05 | < | 0.46 | 0.07 | 0.028 | 0.00318 |

| Apparent Diffusion Coefficient: Oxytocin Females and Males |         |      |   |       |      |       |         |
|------------------------------------------------------------|---------|------|---|-------|------|-------|---------|
| Brain Area                                                 | Females |      |   | Males |      | P val | Effect  |
|                                                            | Mean    | SD   |   | Mean  | SD   |       |         |
| posterior hypothalamic area                                | 1.36    | 0.20 | > | 1.28  | 0.16 | 0.204 | 0.08826 |
| lateral amygdaloid nucleus                                 | 1.33    | 0.14 | < | 1.39  | 0.13 | 0.210 | 0.06107 |
| paraventricular nuclus                                     | 1.36    | 0.17 | > | 1.29  | 0.13 | 0.214 | 0.07412 |
| periaqueductal gray                                        | 1.37    | 0.15 | > | 1.31  | 0.14 | 0.215 | 0.06965 |
| olfactory tubercles                                        | 1.81    | 0.45 | > | 1.64  | 0.39 | 0.245 | 0.14519 |
| lateral paragigantocellular nucleus                        | 2.06    | 0.58 | > | 1.85  | 0.44 | 0.248 | 0.15664 |
| lateral septal nucleus                                     | 1.43    | 0.13 | < | 1.48  | 0.12 | 0.279 | 0.04608 |
| anterior hypothalamic area                                 | 1.51    | 0.35 | > | 1.39  | 0.27 | 0.295 | 0.1161  |
| tegmental nucleus                                          | 1.31    | 0.14 | > | 1.26  | 0.13 | 0.316 | 0.05427 |
| tenia tecta ctx                                            | 1.59    | 0.30 | > | 1.50  | 0.25 | 0.355 | 0.0843  |
| Ventricle                                                  | 1.58    | 0.15 | < | 1.62  | 0.11 | 0.367 | 0.03688 |
| medial preoptic area                                       | 1.48    | 0.28 | > | 1.41  | 0.23 | 0.415 | 0.07321 |
| secondary somaotsensory ctx                                | 1.23    | 0.13 | < | 1.27  | 0.13 | 0.439 | 0.04088 |
| diagonal band of Broca                                     | 1.46    | 0.25 | > | 1.40  | 0.21 | 0.443 | 0.06346 |
| lateral preoptic area                                      | 1.49    | 0.29 | > | 1.41  | 0.24 | 0.448 | 0.07056 |
| dorsal raphe                                               | 1.32    | 0.12 | > | 1.28  | 0.14 | 0.456 | 0.03791 |
| reuniens nucleus                                           | 1.26    | 0.16 | > | 1.22  | 0.14 | 0.465 | 0.04513 |
| 6th cerebellar lobule                                      | 1.08    | 0.16 | > | 1.03  | 0.18 | 0.469 | 0.06025 |
| prelimbic ctx                                              | 1.45    | 0.15 | < | 1.49  | 0.15 | 0.472 | 0.03677 |
| perirhinal ctx                                             | 1.28    | 0.27 | < | 1.36  | 0.31 | 0.480 | 0.07554 |
| pontine reticular nucleus oral                             | 1.42    | 0.22 | > | 1.36  | 0.27 | 0.488 | 0.06303 |
| caudate putamen (striatum)                                 | 1.21    | 0.12 | < | 1.23  | 0.12 | 0.524 | 0.03158 |
| habenula nucleus                                           | 1.31    | 0.15 | < | 1.35  | 0.19 | 0.526 | 0.04112 |
| medial amygdaloid nucleus                                  | 1.60    | 0.35 | > | 1.52  | 0.34 | 0.528 | 0.07104 |
| trigeminal complex pons                                    | 1.81    | 0.44 | > | 1.71  | 0.43 | 0.531 | 0.07762 |
| anterior amygdaloid nucleus                                | 1.62    | 0.33 | > | 1.54  | 0.41 | 0.533 | 0.07465 |
| auditory ctx                                               | 1.24    | 0.10 | < | 1.27  | 0.16 | 0.533 | 0.03382 |
| dorsal medial nucleus                                      | 1.59    | 0.48 | > | 1.51  | 0.20 | 0.534 | 0.07237 |
| 2nd cerebellar lobule                                      | 1.34    | 0.20 | > | 1.30  | 0.21 | 0.538 | 0.04769 |
| claustrum                                                  | 1.18    | 0.14 | < | 1.21  | 0.11 | 0.539 | 0.03185 |
| primary motor ctx                                          | 1.46    | 0.17 | < | 1.49  | 0.19 | 0.556 | 0.03508 |
| medullary reticular nucleus                                | 1.89    | 0.64 | > | 1.78  | 0.46 | 0.578 | 0.08247 |
| paraflocculus cerebellum                                   | 1.63    | 0.59 | > | 1.53  | 0.41 | 0.579 | 0.0861  |
| CA1                                                        | 1.39    | 0.17 | > | 1.36  | 0.15 | 0.580 | 0.03361 |
| raphe magnus                                               | 2.01    | 0.68 | > | 1.89  | 0.55 | 0.580 | 0.08568 |
| ventral thalamic nuclei                                    | 1.26    | 0.14 | > | 1.23  | 0.14 | 0.585 | 0.03056 |
| vestibular nucleus                                         | 1.29    | 0.12 | > | 1.26  | 0.15 | 0.586 | 0.02905 |
| temporal ctx                                               | 1.26    | 0.18 | < | 1.30  | 0.22 | 0.587 | 0.04304 |
| gigantocellular reticular nucleus                          | 1.50    | 0.37 | > | 1.43  | 0.38 | 0.600 | 0.06719 |
| superior colliculus                                        | 1.29    | 0.15 | > | 1.26  | 0.13 | 0.605 | 0.02826 |
| retrosplenial ctx                                          | 1.60    | 0.20 | < | 1.64  | 0.22 | 0.605 | 0.03314 |

|                                 |      |      |   |      |      |       |         |
|---------------------------------|------|------|---|------|------|-------|---------|
| zona incerta                    | 1.35 | 0.23 | > | 1.31 | 0.22 | 0.606 | 0.04358 |
| 9th cerebellar lobule           | 1.31 | 0.13 | < | 1.33 | 0.19 | 0.615 | 0.03052 |
| nucleus lateral olfactory tract | 1.79 | 0.59 | > | 1.68 | 0.67 | 0.622 | 0.08873 |
| subiculum                       | 1.46 | 0.35 | > | 1.40 | 0.24 | 0.625 | 0.05103 |
| lateral hypothalamus            | 1.69 | 0.42 | > | 1.62 | 0.35 | 0.638 | 0.05419 |
| cuneate nucleus                 | 1.31 | 0.16 | < | 1.34 | 0.25 | 0.645 | 0.0363  |
| reticular formation             | 1.34 | 0.19 | > | 1.31 | 0.19 | 0.663 | 0.03163 |

### Fractional Anisotropy: Oxytocin Females and Males

| Brain Area                      | Females (n=17) |      |   | Males (n=16) |      | P val | Effect  |
|---------------------------------|----------------|------|---|--------------|------|-------|---------|
|                                 | Mean           | SD   |   | Mean         | SD   |       |         |
| posterior hypothalamic area     | 0.55           | 0.07 | > | 0.50         | 0.09 | 0.075 | 0.14445 |
| parafascicular thalamic nucleus | 0.48           | 0.07 | > | 0.44         | 0.09 | 0.197 | 0.12223 |
| ventral tegmental area          | 0.56           | 0.06 | > | 0.52         | 0.06 | 0.064 | 0.1192  |
| habenula nucleus                | 0.48           | 0.09 | > | 0.45         | 0.09 | 0.253 | 0.11422 |
| bed nucleus stria terminalis    | 0.50           | 0.06 | > | 0.46         | 0.09 | 0.191 | 0.11089 |
| parietal ctx                    | 0.49           | 0.05 | > | 0.46         | 0.08 | 0.181 | 0.10247 |
| dorsal medial nucleus           | 0.55           | 0.08 | > | 0.51         | 0.08 | 0.234 | 0.09392 |
| 10th cerebellar lobule          | 0.53           | 0.04 | > | 0.49         | 0.05 | 0.073 | 0.09293 |
| nucleus lateral olfactory tract | 0.51           | 0.07 | > | 0.48         | 0.06 | 0.218 | 0.08411 |
| dentate gyrus                   | 0.52           | 0.04 | > | 0.49         | 0.08 | 0.235 | 0.0829  |
| ventral medial nucleus          | 0.51           | 0.07 | < | 0.54         | 0.04 | 0.141 | 0.08217 |
| diagonal band of Broca          | 0.45           | 0.06 | > | 0.48         | 0.10 | 0.355 | 0.08207 |
| lateral amygdaloid nucleus      | 0.51           | 0.05 | > | 0.49         | 0.09 | 0.301 | 0.08167 |
| CA3                             | 0.54           | 0.04 | > | 0.51         | 0.07 | 0.181 | 0.08134 |
| claustrum                       | 0.47           | 0.06 | > | 0.44         | 0.10 | 0.371 | 0.0808  |
| secondary motor ctx             | 0.48           | 0.06 | > | 0.45         | 0.09 | 0.373 | 0.08001 |
| interpeduncular nucleus         | 0.54           | 0.06 | > | 0.51         | 0.06 | 0.228 | 0.07444 |
| substantia nigra                | 0.59           | 0.04 | > | 0.56         | 0.05 | 0.121 | 0.06825 |
| primary motor ctx               | 0.47           | 0.05 | > | 0.45         | 0.09 | 0.442 | 0.06572 |
| pontine nuclei                  | 0.49           | 0.10 | > | 0.51         | 0.03 | 0.356 | 0.06518 |
| 9th cerebellar lobule           | 0.54           | 0.05 | > | 0.51         | 0.05 | 0.202 | 0.06355 |
| parvicellular reticular nucleus | 0.53           | 0.05 | > | 0.51         | 0.06 | 0.271 | 0.05979 |
| anterior olfactory nucleus      | 0.49           | 0.03 | > | 0.47         | 0.07 | 0.351 | 0.05818 |
| tenia tecta ctx                 | 0.52           | 0.04 | > | 0.50         | 0.07 | 0.349 | 0.05668 |
| facial nucleus medulla          | 0.52           | 0.04 | > | 0.50         | 0.05 | 0.245 | 0.05523 |
| primary somatosensory ctx       | 0.47           | 0.05 | > | 0.45         | 0.08 | 0.481 | 0.05419 |
| lateral geniculate              | 0.55           | 0.04 | > | 0.53         | 0.06 | 0.302 | 0.05357 |
| lemniscal nucleus               | 0.52           | 0.05 | > | 0.54         | 0.04 | 0.198 | 0.05312 |
| red nucleus                     | 0.54           | 0.06 | > | 0.52         | 0.09 | 0.488 | 0.05294 |
| medial geniculate               | 0.53           | 0.05 | > | 0.52         | 0.08 | 0.419 | 0.05289 |
| ventral thalamic nuclei         | 0.57           | 0.05 | > | 0.55         | 0.06 | 0.323 | 0.05265 |
| medullary reticular nucleus     | 0.55           | 0.06 | > | 0.53         | 0.05 | 0.306 | 0.05185 |
| olfactory tubercles             | 0.52           | 0.04 | > | 0.50         | 0.06 | 0.340 | 0.0492  |
| 8th cerebellar lobule           | 0.54           | 0.05 | > | 0.53         | 0.05 | 0.274 | 0.04893 |
| infralimbic ctx                 | 0.51           | 0.05 | > | 0.53         | 0.07 | 0.393 | 0.04893 |
| lateral preoptic area           | 0.57           | 0.06 | > | 0.55         | 0.07 | 0.437 | 0.04858 |
| central medial thalamic nucleus | 0.52           | 0.07 | > | 0.50         | 0.08 | 0.527 | 0.04685 |
| visual 2 ctx                    | 0.51           | 0.05 | > | 0.50         | 0.07 | 0.458 | 0.0467  |
| prelimbic ctx                   | 0.46           | 0.06 | > | 0.45         | 0.08 | 0.575 | 0.04665 |
| orbital ctx                     | 0.46           | 0.04 | > | 0.45         | 0.08 | 0.523 | 0.04541 |
| visual 1 ctx                    | 0.50           | 0.05 | > | 0.48         | 0.06 | 0.447 | 0.0454  |

|                                    |      |      |   |      |      |       |         |
|------------------------------------|------|------|---|------|------|-------|---------|
| cuneate nucleus                    | 0.53 | 0.05 | > | 0.52 | 0.05 | 0.348 | 0.04477 |
| reuniens nucleus                   | 0.55 | 0.07 | > | 0.53 | 0.08 | 0.520 | 0.04428 |
| Pon                                | 0.51 | 0.07 | > | 0.52 | 0.04 | 0.419 | 0.04358 |
| posterior thalamic nucleus         | 0.54 | 0.05 | > | 0.52 | 0.08 | 0.508 | 0.04352 |
| vestibular nucleus                 | 0.51 | 0.05 | > | 0.50 | 0.06 | 0.460 | 0.04265 |
| granular cell layer olfactory bulb | 0.47 | 0.04 | > | 0.45 | 0.07 | 0.513 | 0.04214 |
| 6th cerebellar lobule              | 0.51 | 0.07 | > | 0.50 | 0.06 | 0.516 | 0.04205 |
